# Supplementary material for: Dynamic Interstitial Cell Response during Myocardial Infarction Predicts Resilience to Rupture in Genetically Diverse Mice
Source: PubMed Central journal article supplement — Cell Rep. 2020 Mar 3;30(9):3149–3163.e6. doi: 10.1016/j.celrep.2020.02.008 (PMC7059115; doi:10.1016/j.celrep.2020.02.008), 2020-03-03
Supplement: mmc9.pdf [file mmc9.pdf]

# Cell Reports

## Dynamic Interstitial Cell Response during Myocardial Infarction Predicts Resilience to Rupture in Genetically Diverse Mice

### Graphical Abstract

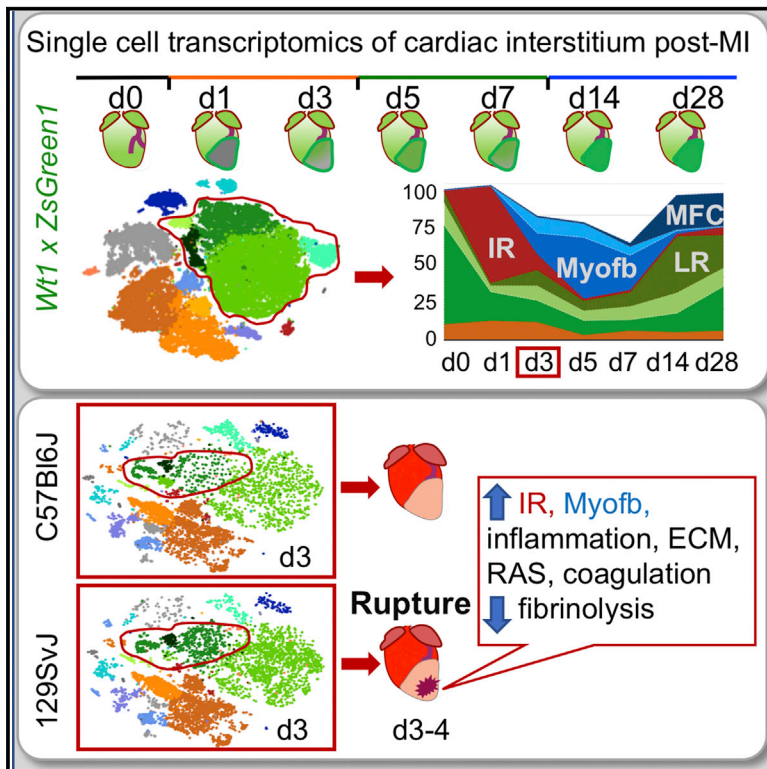

### Authors

Elvira Forte, Daniel A. Skelly, Mandy Chen, ..., Mauro W. Costa, Nadia A. Rosenthal, Milena B. Furtado

### Correspondence

elvira.forte@jax.org (E.F.),  
mfurtado@amgen.com (M.B.F.)

### In Brief

Using single-cell transcriptional profiling of mouse hearts carrying a reporter for epicardial-derived cells, Forte et al. provide a dynamic view of cardiac interstitial responses across acute and chronic phases of remodeling post-infarction. Comparing responses on diverse genetic backgrounds reveals novel cellular and transcriptional features of cardiac rupture propensity.

### Highlights

- Longitudinal transcriptional profiling of cardiac interstitial cells post-infarct
- Identification of epicardial versus endocardial origin of cardiac stromal cells
- A distinct early injury-response signature precedes appearance of myofibroblasts
- Modulation of early fibrosis predicts cardiac rupture and pathological remodeling

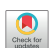

# Dynamic Interstitial Cell Response during Myocardial Infarction Predicts Resilience to Rupture in Genetically Diverse Mice

Elvira Forte,<sup>1,4,\*</sup> Daniel A. Skelly,<sup>1</sup> Mandy Chen,<sup>1</sup> Sandra Daigle,<sup>1</sup> Kaesi A. Morelli,<sup>1</sup> Olivia Hon,<sup>1</sup> Vivek M. Philip,<sup>1</sup> Mauro W. Costa,<sup>1</sup> Nadia A. Rosenthal,<sup>1,2</sup> and Milena B. Furtado<sup>1,3,\*</sup>

<sup>1</sup>The Jackson Laboratory, Bar Harbor, ME 04609, USA

<sup>2</sup>National Heart and Lung Institute, Imperial College London, London SW72BX, UK

<sup>3</sup>Present address: Amgen, 1120 Veterans Blvd., South San Francisco, CA 94080, USA

<sup>4</sup>Lead Contact

\*Correspondence: [elvira.forte@jax.org](mailto:elvira.forte@jax.org) (E.F.), [mfurtado@amgen.com](mailto:mfurtado@amgen.com) (M.B.F.)

<https://doi.org/10.1016/j.celrep.2020.02.008>

## SUMMARY

Cardiac ischemia leads to the loss of myocardial tissue and the activation of a repair process that culminates in the formation of a scar whose structural characteristics dictate propensity to favorable healing or detrimental cardiac wall rupture. To elucidate the cellular processes underlying scar formation, here we perform unbiased single-cell mRNA sequencing of interstitial cells isolated from infarcted mouse hearts carrying a genetic tracer that labels epicardial-derived cells. Sixteen interstitial cell clusters are revealed, five of which were of epicardial origin. Focusing on stromal cells, we define 11 sub-clusters, including diverse cell states of epicardial- and endocardial-derived fibroblasts. Comparing transcript profiles from post-infarction hearts in C57BL/6J and 129S1/SvImJ inbred mice, which displays a marked divergence in the frequency of cardiac rupture, uncovers an early increase in activated myofibroblasts, enhanced collagen deposition, and persistent acute phase response in 129S1/SvImJ mouse hearts, defining a crucial time window of pathological remodeling that predicts disease outcome.

## INTRODUCTION

Myocardial infarction (MI) is defined by extensive myocardial cell death due to prolonged ischemia (Thygesen et al., 2018) and remains a main cause of morbidity and mortality worldwide. The ability to regenerate the heart in lower vertebrates and neonates has been attributed to the proliferation of pre-existing cardiomyocytes (Foglia and Poss, 2016), a property that is almost entirely lost in the adult mammalian heart, where response to injury results in the formation of a scar. The outcome of the repair process is highly dependent on the extent of myocardial death and on the interplay between the inflammatory response and fibrosis (Forte et al., 2018), which can lead to rupture or adverse ventricular remodeling and heart failure.

Cardiac interstitial cells are increasingly recognized as main players in organ injury response. They constitute 60%–70% of the total cells of the heart and include immune cells, endothelial cells, smooth muscle cells (SMCs), pericytes, fibroblasts, and various putative stem cell populations. Traditionally, most mesenchymal cell types in the heart have been defined and sub-selected based on the expression of surface markers, but no stem cell marker identified to date is unique to a particular stromal cell type, and the relations of putative stem cell sub-populations to other mesenchymal cells in the cardiac interstitium are unclear (Forte et al., 2018). While the existence of any significant population of resident cardiac stem cells in the adult heart has been largely disproved (Chien et al., 2019), heterogeneity in the mesenchymal-stromal fraction of the mammalian cardiac cellulome likely indicates a spectrum of different functions in both homeostasis and response to injury (Skelly et al., 2018).

Previous explorations of cardiac cellular diversity in the mouse heart characterizing single-cell transcriptional profiles of major non-myocyte cell populations (Farbehi et al., 2019; Kretzschmar et al., 2018; Pinto et al., 2016; Skelly et al., 2018) have yielded valuable insights into the structure of the cardiac cellulome. To develop a more definitive compendium of interstitial cell types and transitions in response to cardiac injury, we applied unbiased single-cell RNA sequencing (scRNA-seq) to profile the progression of gene expression patterns in cardiac interstitial cells through the three main phases of post-MI response: inflammation, proliferation, and maturation. Analysis of multiple closely spaced time points immediately after MI revealed a rapidly changing landscape of interstitial cell types, providing a detailed and comprehensive characterization of cellular features and building a precise map of stromal cell evolution in response to injury.

Given the dramatic differences in myocardial response to infarction among genetically diverse mice (Salimova et al., 2019), we analyzed two inbred strains, C57BL/6J and 129S1/SvImJ, to define distinct cellular features at the transition between inflammatory and proliferative phases, when the two strains display major differences in the incidence of early rupture (23% versus 59%, respectively). These studies reveal significantly different fibroblast states in hearts that are genetically prone to post-MI rupture, pinpointing specific cell populations that define reparative outcome in the damaged myocardium,

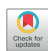

which represent promising targets for anti-fibrotic treatments of heart failure.

## RESULTS

### Single-Cell Analysis Defines the Interstitial Cell Landscape Post-MI

To profile cell dynamics in response to MI, we performed unbiased scRNA-seq on live nucleated interstitial cells using the 10X Chromium technology (Zheng et al., 2017). Since the epicardium, the mesothelium covering the heart, is the major source (~80%) of cardiac fibroblasts in homeostasis (Furtado et al., 2016; Smith et al., 2011), we traced the stromal component using C57BL/6J *Wt1<sup>Cre</sup>;RosaZsGreen<sup>fl/+</sup>* mice, in which an enhanced green fluorescent protein (EGFP) variant (ZsGreen1) marks epicardial derivatives. To obtain a clean preparation of interstitial cells, we removed cardiomyocytes, debris, and dead cells by straining the cell suspension through 40- $\mu$ m meshes using magnetic beads-based dead cell depletion and sorting for nucleated (DRAQ<sup>+</sup>) live (DAPI<sup>-</sup>) cells. A total of 36,847 live, nucleated interstitial cells were captured at homeostasis and at days (d) 1 and 3 (inflammatory phase), 5 and 7 (proliferative phase), and 14 and 28 (maturation phase) post-MI from 7 mice (Figure 1A; Table S1; Forte et al., 2018). Whole-mount images showed a diffuse ZsGreen fluorescence in homeostasis, which increased in intensity after injury, transiting from global heart activation (d1) to the border zone of the infarct (d3–d5) and onward into the scar area (d5–d28) (Figure 1B). ZsGreen<sup>+</sup> cells increased in the late remodeling phase, indicating the presence of epicardial-derived cells in the mature scar (Figure 1C). Global clustering of single-cell transcriptomes (Butler et al., 2018; Zheng et al., 2017) revealed 16 main populations, identified by marker genes preferentially expressed in each cluster (Figures 1D–1G; Table S2). These populations included endothelium (*Fabp4*, *Pecam1*); lymphatic endothelium (*Lyve1*, *Cldn5*); SMCs (*Rgs5*, *Vtn*, *Kcnj8*); Schwann cells (*Plp1*, *Kcna1*); 7 immune cell populations (granulocytes [*S100a8*, *S100a9*], monocytes I [*Chil3*, *Plac8*] and II [*Saa3*, *Arg1*], macrophages [*C1qa*, *Cd68*], dendritic cells [DCs; *H2ab1*, *Cd74*], B cells [*Cd79a*, *H2-DMb2*], and a mixed T-natural killer [NK] cell cluster [*Nkg7*, *Ms4a4b*, *Gzma*]); three fibroblast populations (types I [*Col1a1*, *Gsn*, *Dcn*], II [*Wif1*, *Dkk3*], and III [*Mt2*, *Timp1*]); myofibroblasts (*Myofb*; [*Cthrc1*, *Acta2*, *Postn*]); and epicardium (*Clu*, *Dmkn*)—all of these are described in more detail in Figures 1D and 1E.

ZsGreen expression marking epicardial origin was predominant in five clusters: epicardium, smooth muscle, and fibroblast types I–III (Figures 1E and S1A). Co-expression of *Wt1* and ZsGreen marked a minor percentage of endothelial (~1%) and smooth muscle (~2%) cells, as well as the activated post-MI epicardium, indicating *de novo* expression of the gene, verified using immunofluorescence (Figures S1B–S1D). No *de novo* expression of *Wt1* mRNA was seen in fibroblasts, confirming that post-MI activated fibroblasts derive from the pre-existing *Wt1<sup>Cre</sup>;RosaZsGreen<sup>fl/+</sup>* labeled pool of cells.

A dynamic and choreographed contribution of cell types evolved during infarct resolution (Figures 1F and 1G). Innate immune cells accumulated immediately after MI (Figures 1D–1G): short-lived neutrophils peaked within 24 h (Forte et al., 2018),

monocytes appeared between d1 and d7, and macrophages peaked ~d3–d7. Cell ratios returned to near-homeostatic levels during the maturation phase of MI (d14–d28), with fibroblasts and endothelial cells prevailing over immune components (Figure 1G). Whereas a significant fraction of new cell types and states were observed in the stromal and innate immune cell aggregates during recovery from MI, adaptive immune and vascular/mural cells were relatively stable (Figure S2).

### Dynamics of Stromal Populations Involved in Scar Formation

To obtain a more detailed portrait of stromal transition from homeostasis (Furtado et al., 2014; Pinto et al., 2016; Skelly et al., 2018) to post-MI response, fibroblast types I–III, Myofb, and mesothelial epicardial populations were aggregated and sub-clustered. Twelve sub-clusters were obtained (Figures 2A, 2B, S3, and S4; Table S3). Cellular trajectories were defined using SPRING (Weinreb et al., 2018) (links to SPRING visualization in Figure S2C). Predictions using DoubletFinder (McGinnis et al., 2019) revealed an overall very low percentage of predicted doublets across clusters and sub-clusters (Figure S3). Three clusters were excluded from further analyses due to low cell representation or mixed identity: a small cluster defined by interferon-response (IFN $\alpha$ ) genes (*Ifit3*, *Isg15*, *Ifit1*), a few dendritic-like cells (*Cd52*, *C1qb*) with a relatively higher frequency of predicted doublets (0.5%; Figure S3) compared to other clusters and sub-clusters, and phagocytic cells (mixed myeloid-Myofb signature; *Actb*, *Notch2*, *Lyz2*, *P2y12*). The latter cells were enriched during the post-MI proliferative phase (d3–d7) and were transcriptionally similar to proliferating Myofb (Figure S4B), presenting a relatively higher expression of genes involved in metabolic processes and oxidative phosphorylation (Figures 2E and S4).

Within the type I fibroblast population, three closely related populations of ZsGreen<sup>+</sup> epicardial-derived fibroblasts (EpiDs) were obtained and defined, based on temporal prevalence and/or marker expression, as homeostatic epicardial derived fibroblasts (HEPiDs), progenitor-like state fibroblasts (PLSs), and late-resolution (LR) fibroblasts. HEPiDs were characterized by a relatively higher level of expression of genes associated with the response to organic substances and metabolic effectors: *Dpep1*, a zinc-dependent metalloproteinase involved in glutathione and leukotriene metabolism, which may have a role in transforming growth factor  $\beta$  (TGF- $\beta$ )-induced epithelial-mesenchymal transition (EMT) (Park et al., 2016); *Lpl*, important for lipoprotein triglyceride metabolism (Fernández-Borja et al., 1996; Xie et al., 2018); *Hsd11b1*, which converts cortisol to its inactive form, cortisone, and may affect dermal fibroblast proliferation (Terao et al., 2014); and the pleiotropic chemokine *Cxcl14* (Hara and Tanegashima, 2012; Lu et al., 2016; Figures 2C–2E and S4C). PLSs were relatively stable across all time points (Figure 2B), expressed genes associated to cell migration and morphogenesis, known stromal cell markers *Cd248* (Smith et al., 2015), *Pi16* (Regn et al., 2016; Xie et al., 2018), and relatively higher levels of *Ly6a*, previously used as a marker to enrich for putative cardiac progenitor cells (Tang et al., 2018; Farbehi et al., 2019; Oh et al., 2003; Figures 2C–2E and S4C). LR fibroblasts were prevalent at d14–d28 (maturation phase), expressing a relatively higher level of genes associated with cell



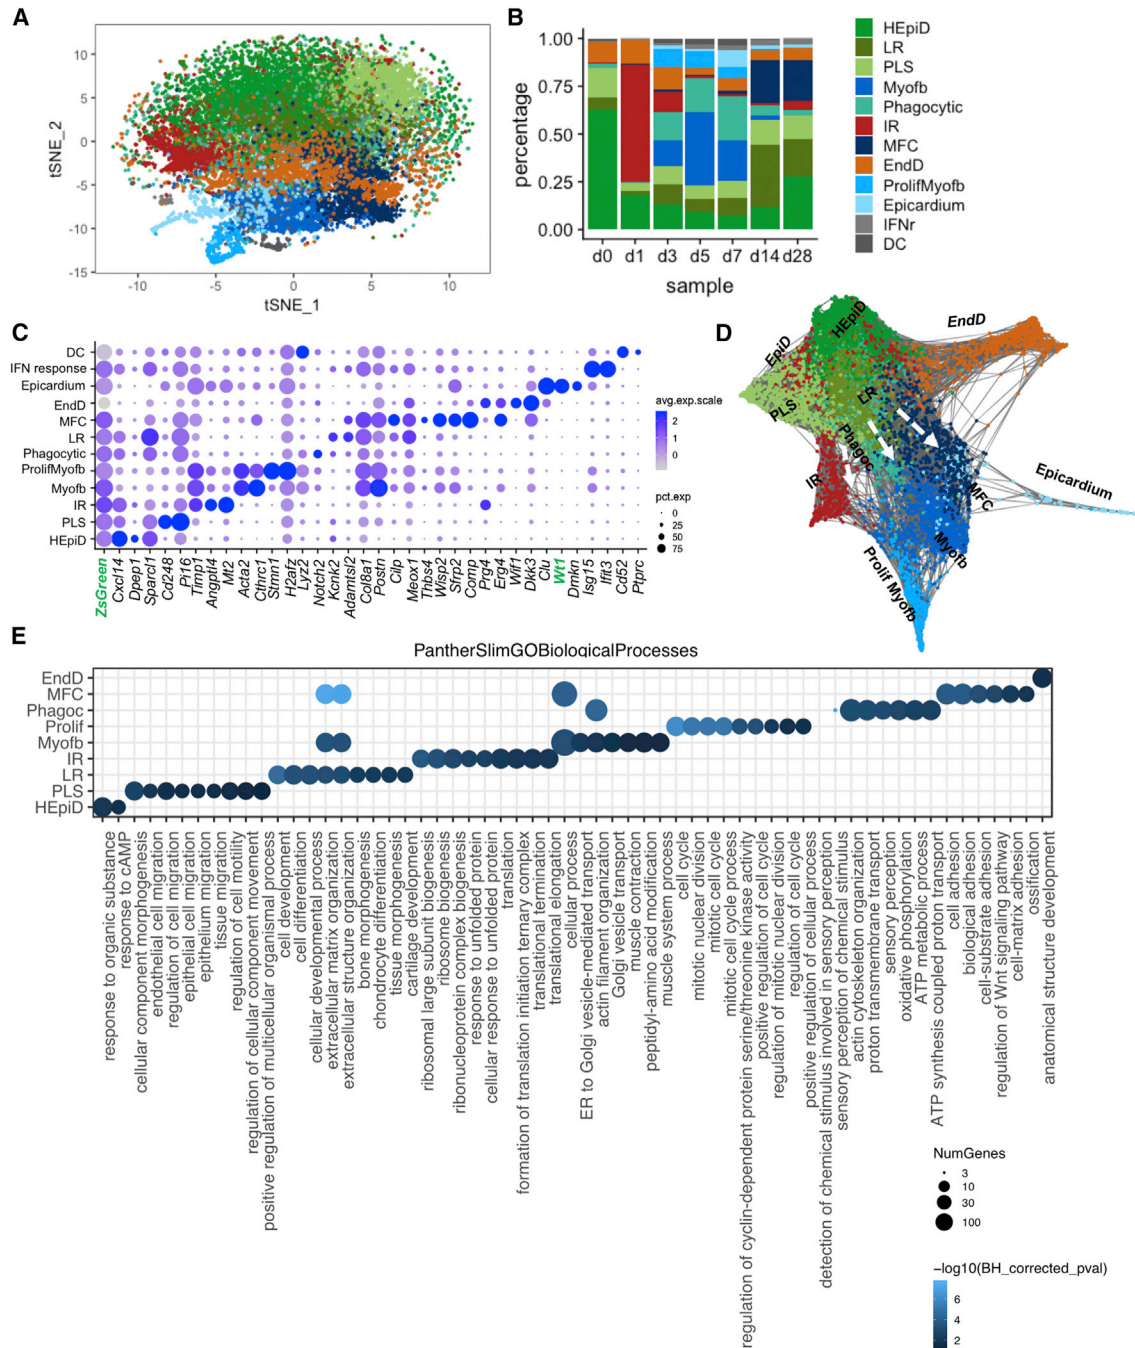

**Figure 2. Evolution of Fibroblast States across Phases of Repair**

(A) t-SNE plot of combined stromal clusters (fibroblasts I, II, and III, myofibroblasts) and epicardium, further sub-clustered by 20 PC, resolution 0.5, colored by cluster separation.

(B) Bar plot representation of the relative frequency of different fibroblast sub-clusters (percentage over total cells) at different time points across repair.

(C) Dot-plot representation of top two signature genes per sub-cluster.

(D) SPRING visualization of fibroblast sub-clusters; 1,200 cells are shown per time point, colored by Seurat-defined clusters.

(E) PANTHER GO-slim biological process overrepresentation analysis of fibroblasts sub-cluster marker genes, showing representative GO terms per each sub-cluster, excluding DCs, dendritic-like cells, and IFNr (interferon-responsive cells). Bonferroni corrected p values.

See also [Figures S2–S4](#) and [Tables S3](#) and [S4](#).

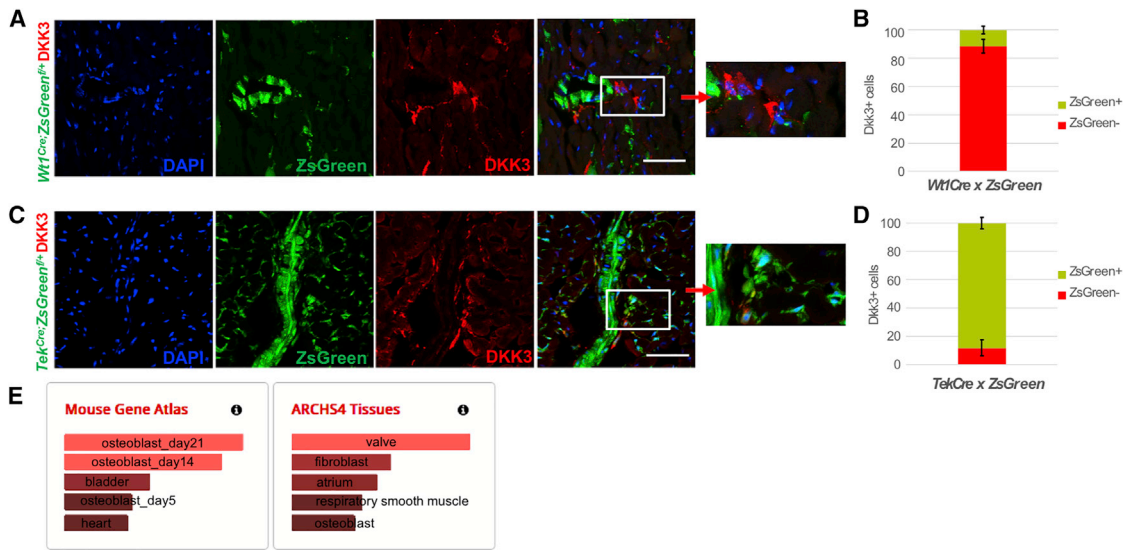

**Figure 3. Endocardial-Derived Fibroblast (EndD) Validation in Homeostatic Ventricles**

(A) Confocal imaging of the EndD marker DKK3 (in red) on cardiac sections from adult *Wt1<sup>Cre</sup>; ZsGreen<sup>fl/fl</sup>* mice. ZsGreen labels epicardial derived cells. (B) Quantification of the percentage of DKK3<sup>+</sup> cells co-labelled with the reporter ZsGreen. Data are represented as mean ± SEM. N = 3 biological replicates, 7 technical replicates. (C) Confocal imaging of DKK3 (in red) on cardiac sections from adult *Tek<sup>Cre</sup>; ZsGreen<sup>fl/fl</sup>* mice. ZsGreen labels endocardial-derived cells. (D) Quantification of the percentage of DKK3<sup>+</sup> cells co-labelled with the reporter ZsGreen. Data are represented as mean ± SEM. N = 3 biological replicates, 7 technical replicates. (E) Enrichr analysis of EndD marker genes identified top related cell (mouse gene atlas) and tissue (ARCHS4 tissues) types. See also Figure S4 and Tables S3 and S4.

the presence of vascular injury (Gerth et al., 2007; Kittelberger et al., 1990; Lopes et al., 2013); and the transcription factor *Meox1*, which is involved in embryonic somitogenesis and TGF-β-induced differentiation of SMCs (Dong et al., 2018; Figures 2C–2E and S4C). *Meox1* is also implicated in cardiac pathological hypertrophy (Lu et al., 2018) and is downregulated during *in vitro* phenotypic conversion from fibroblasts to Acta2<sup>+</sup> Myofb (Cunnington et al., 2014). The observed gene expression pattern of LR fibroblasts and their prevalence during the maturation phase suggests that these cells arise as a consequence of chronic pathological remodeling rather than as direct precursors of Acta2<sup>+</sup> Myofb, as was recently suggested (Farbehi et al., 2019).

The SPRING k-nearest neighbor (knn) graphical representation of stromal cells showed a linear progression from EpiD ZsGreen<sup>+</sup> to Myofb (Figure 2C). Type II fibroblasts (*Wif1*, *Dkk3*) appeared as a distinct sub-cluster, branching separately in the SPRING plot (Figure 2D) and characterized by a gene signature closely related to valve leaflets, with top canonical pathways involved in endochondral ossification and Wnt signaling and Gene Ontology (GO) terms related to anatomical structure morphogenesis and development (Figures 2C–2E, 3E, and S4C). Given the low level of ZsGreen expression in these cells, possibly due to ambient RNA contamination, they are likely endocardial-derived fibroblasts (EndD). Consistently, 88.5% ± 2.27% of the DKK3<sup>+</sup> cells in the ventricles were co-labeled with ZsGreen in *Tek<sup>Cre</sup>; ZsGreen<sup>fl/fl</sup>* mice (which trace endocardial-derived cells), while 88.05% ± 4.02% of EndD cells were ZsGreen<sup>-</sup> in *Wt1<sup>Cre</sup>; RosaZsGreen<sup>fl/fl</sup>* mice (Figure 3). A similar population, recently referred to as Wnt-X (Farbehi et al., 2019), was considered an activated state, since WIF1 protein was

observed immediately after injury in the peri-infarct area (Figure S4D). In contrast, our analysis showed the expression of the signature marker DKK3 already in homeostasis around coronary vessels and valve fibroblasts (Figure 3), suggesting that the segregation of the EndD as a sub-population of fibroblasts may be due to its embryological origin, rather than to an activation state (Figure 2D).

A sub-cluster of ZsGreen<sup>+</sup> EpiD cells, defined by its injury response (IR) properties, and expressing high levels of *Mt1-2* transcripts (Figures 4 and S4B), appeared at d1, preceding Myofb at d3 (Figure 2B). MT1-2 metallothioneins are involved in the alleviation of oxidative stress and immunomodulation (Subramanian Vignesh and Deepe, 2017), and transient *Mt1-2* activation in stress conditions or inflammatory diseases (De et al., 1990) exerts a protective function by reducing apoptosis and excessive fibrosis (Duerr et al., 2016). The IR sub-cluster also showed a high expression of monocyte-macrophage chemoattractants *Ccl2*, *Ccl7*, and *Csf1* and neutrophil activators *Cxcl1* and *Cxcl5*; pro-inflammatory-pro-fibrotic factors *Il33*, *Cxcl12*, and *Tgfb1* (Figure 4B); the metalloprotease inhibitor *Timp1*, which blocks *Mmp1* but can additionally prevent apoptosis and induce proliferation in a range of cell types (Brew and Nagase, 2010); the *Mmp3* metalloprotease, which can degrade the major components of the ECM but not interstitial collagen I (Lu et al., 2011); and matricellular proteins with pro-inflammatory or pro-reparative functions such as *Prg4* (Iqbal et al., 2016) and *Angptl4* (Jamil et al., 2017; Teo et al., 2017). This complex cocktail of regulatory factors implicates the IR cell cluster in the initiation of the inflammatory response and formation of granulation tissue. GO biological terms and canonical

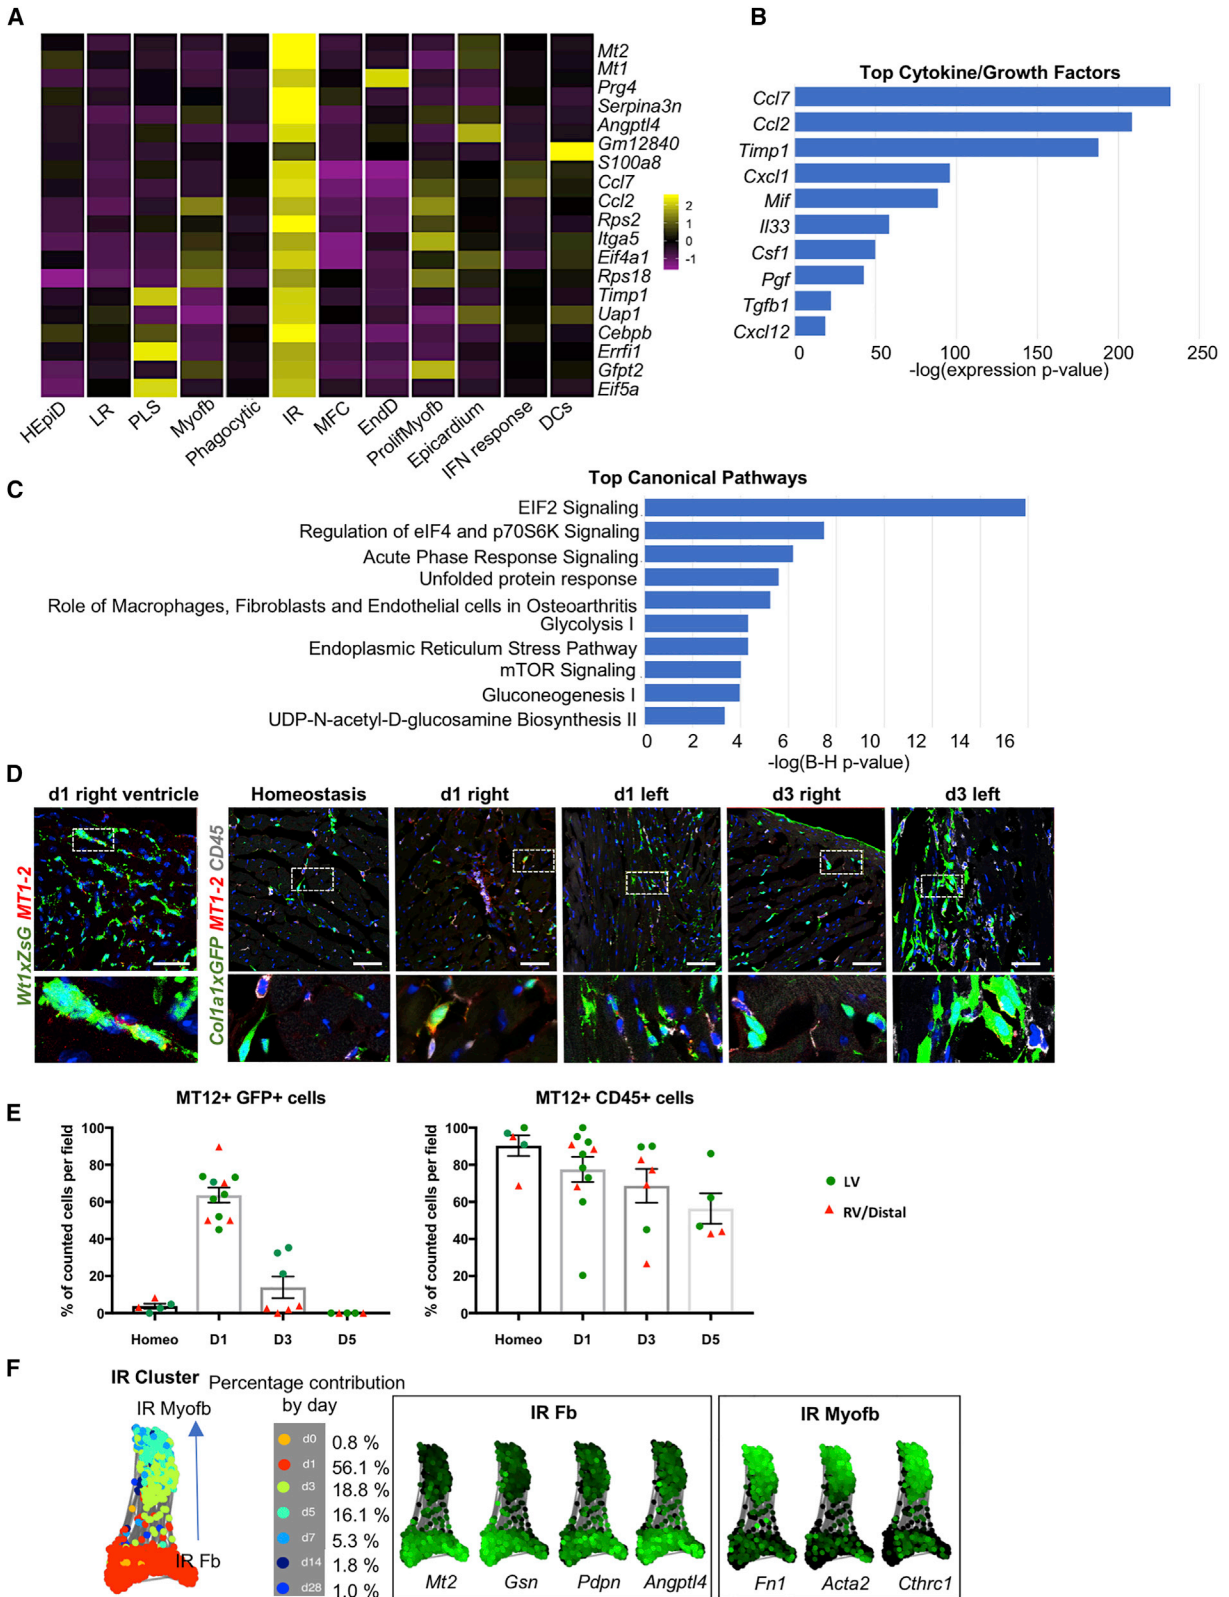

(legend on next page)

pathways associated with this cluster included ribosome biogenesis; regulation of eukaryotic translation initiation factor 2 (eIF2), eIF4, and p70S6K, indicating active protein synthesis and translation; and acute phase response signaling (*Serpina3n*, *Serpina1*, *Tnfrsf1a*), involved in the unfolded protein response and glycolysis (Figures 2E and 4C). To confirm the expression of MT1-2 in stromal cells, immunostaining was performed on *Wt1<sup>cre</sup>;ZsGreen<sup>fl/+</sup>*, to verify the epicardial origin, and *Col1a1<sup>eGFP</sup>* mice, for quantification. While in homeostasis, MT1-2 proteins were expressed mostly in CD45<sup>+</sup> cells (88.9% ± 5.4% of CD45<sup>+</sup> cells, 4% ± 1.3% of Col1a1-EGFP<sup>+</sup> cells; Figures 4D and 4E), reflecting their role in immune cell maturation (Subramanian Vignesh and Deepe, 2017); global activation was detected at d1 in EpiD (ZsGreen<sup>+</sup>) stromal cells, extending from the injury site to remote myocardial areas (62.7% ± 2.5% of Col1a1-GFP<sup>+</sup> cells Figures 4D and 4E). At d3, MT1-2<sup>+</sup> stromal cells were reduced and mostly confined to the scar area (29.6% ± 5% of Col1a1-GFP<sup>+</sup> cells in the scar area versus 6% ± 0.2% distal area), labeling a fraction of Myofb defined by anatomical position, morphology, and high expression of Col1a1-GFP. MT1-2<sup>+</sup> was mostly limited to CD45<sup>+</sup> and sub-epicardial cells at d5. Consistently, SPRING analysis showed that the IR cluster evolved from high expression of *Mt1-2* and stromal and fibroblast genes (*Gsn* [Witke et al., 1995], *Pdpr* [Suchanski et al., 2017], *Angptl4*) on d1 to low expression of *Mt1-2* accompanied by Myofb markers (*Fn1*, *Acta2*, *Cthrc1*) on d3 (Figure 4F), suggesting that IR cells rapidly transition to Myofb, in contrast to a previous report suggesting the appearance of Myofb not earlier than d7 post-MI (Farbehi et al., 2019).

Myofb, large cells with highly active endoplasmic reticulum, are defined as specialized fibroblasts that appear post-injury, produce a high quantity of ECM components, and acquire some phenotypic and functional features of SMCs, such as contraction capacity upon stimulation, essential for the closure and stabilization of the injury site (Baum and Duffy, 2011; Forte et al., 2018). Our analysis showed a linear progression from EpiD ZsGreen<sup>+</sup> to Myofb (Figure 2D). Three main populations of Myofb were observed post sub-clustering: Myofb (*Acta2*, *Cthrc1*), ProlifMyofb (*Acta2*, *Cthrc1*, cell-cycle genes) from d3 to d7, and a group of cells similar to the recently defined matrifibrocytes (MFCs) (Fu et al., 2018) enriched in the mature scar (d14–d28). MFCs expressed genes related to osteoblasts and chondrocytes, similarly to EndD fibroblasts (Figure 5), such as cartilage oligomeric matrix protein (*Comp*), an ECM protein present in cartilage that catalyzes the assembly of collagens and formation of fibrils (Halász et al., 2007), and genes associated

with fibrosis and collagen signaling, similar to LR fibroblasts and Myofb. Pairwise differential gene expression analysis of all fibroblast states using Seurat revealed that, compared to EndD, MFCs had higher levels of ECM components (*Col8a1*, *Fn1*, *Fbn1*, *Itgbl1*, *Wisp2*, and *Cthrc1*) and notably did not express the Wnt inhibitor *Wif1* (Figure S4C; Table S4). Compared to Myofb, MFCs had reduced expression of genes associated with contractility (*Acta2*, *Tagln*, *Tpm2*, and *Myh9*) or ECM components (*Timp1*, *Tnc*, *Cthrc1*, and *Col1a1*), but expressed *Comp* and *Angptl7* and *Fbln1* and *Cilp*, supporting the transition to a less contractile, less secretory cell type producing components of a more stable, chondrogenic-like ECM.

To visualize the conversion between these two cell types in the injury site, immunofluorescence was performed using ACTA2 and CTHRC1 as Myofb markers. MFC markers included SFRP2, a pro-reparative paracrine factor (Mirotsov et al., 2007), and CLU, a widely expressed glycoprotein upregulated in senescent fibroblasts or under different stress conditions. CLU may play a role in apoptosis, debris removal, and folding of secreted proteins (Jenne and Tschopp, 1992; Jones and Jomary, 2002; Figures 5B and 5C). ACTA2 staining in Myofb was seen at a lower intensity than in SMCs starting from d3, and was mostly limited to vessels at d14–d28, while Myofb CTHRC1 staining persisted at late stages. In MFCs, SFRP2 and CLU staining increased at later stages; the latter was also expressed in activated endocardium and epicardium (Figure 5C). qPCR analysis on Col1a1-EGFP<sup>+</sup> stromal cells isolated from the scar and distal myocardial areas of the heart at d5–d14 post-MI confirmed that Myofb markers *Acta2* and *Tnc* were significantly higher in the scar during the proliferation phase (d5), while MFC markers *Ecrq4*, *Comp*, *Sfrp2*, *Thbs4*, *Wisp2*, *Meox1*, and *Col8a1* were up-regulated at d14. *Meox1*, *Comp*, *Ecrq4*, and *Col8a1* were unaltered or not significantly changed in the d5 distal area compared to the control, confirming their enrichment in LR fibroblasts. These results underscore the dynamic stromal response to cardiac injury, which induces a complex orchestration of multiple cell subtypes responsible for post-MI remodeling.

### Genetically Determined Factors Confer Resilience to Cardiac Rupture

Genetic background dictates differences in initial cardiac stromal cell composition that may influence the course of replacement fibrosis in cardiovascular disease (Forte et al., 2018; Salimova et al., 2019). Here, we took advantage of the genetic diversity across inbred mouse strains to investigate the variation in response to MI: C57BL/6J or B6J (control), 129S1/SvImJ or 129 (prone to hypertension), DBA/2J (prone to calcification),

#### Figure 4. An Epicardial-Derived Injury Response (IR) Fibroblast Population in the Early Phase of Repair Post-MI

- (A) Heatmap of the average expression of the top 20 signature IR cluster genes across all fibroblast sub-clusters.  
 (B) Top cytokines and chemokines produced by the IR cluster.  
 (C) Top IR cluster canonical pathways identified using Ingenuity Pathway Analysis (IPA).  
 (D) Confocal imaging of MT1-2 staining in IR fibroblasts at d1 and d3 post-MI using *Wt1<sup>cre</sup>;ZsGreen<sup>fl/+</sup>* and *Col1a1<sup>eGFP</sup>* reporter mice.  
 (E) Scatterplot showing the percentage of MT1-2<sup>+</sup> cells co-labeled with the reporter *Col1a1<sup>eGFP</sup>* or CD45 (gray). A total of 5–10 frames were counted per each time point, 2–3 mice per time point. Data are represented as means ± SEMs. LV (green dot) is the left ventricle injury site; RV/Distal (red triangle), right ventricle, area distal from the injury site.  
 (F) SPRING visualization of the IR sub-cluster showing time course evolution of cluster identity (blue arrow) from fibroblast (Fb) to myofibroblast (Myofb). Plots on right panels show marker genes that distinguish early (Fb) from late (Myofb) IR cells. Scale bars, 50 μm.  
 See also Figure S4 and Tables S3 and S4.



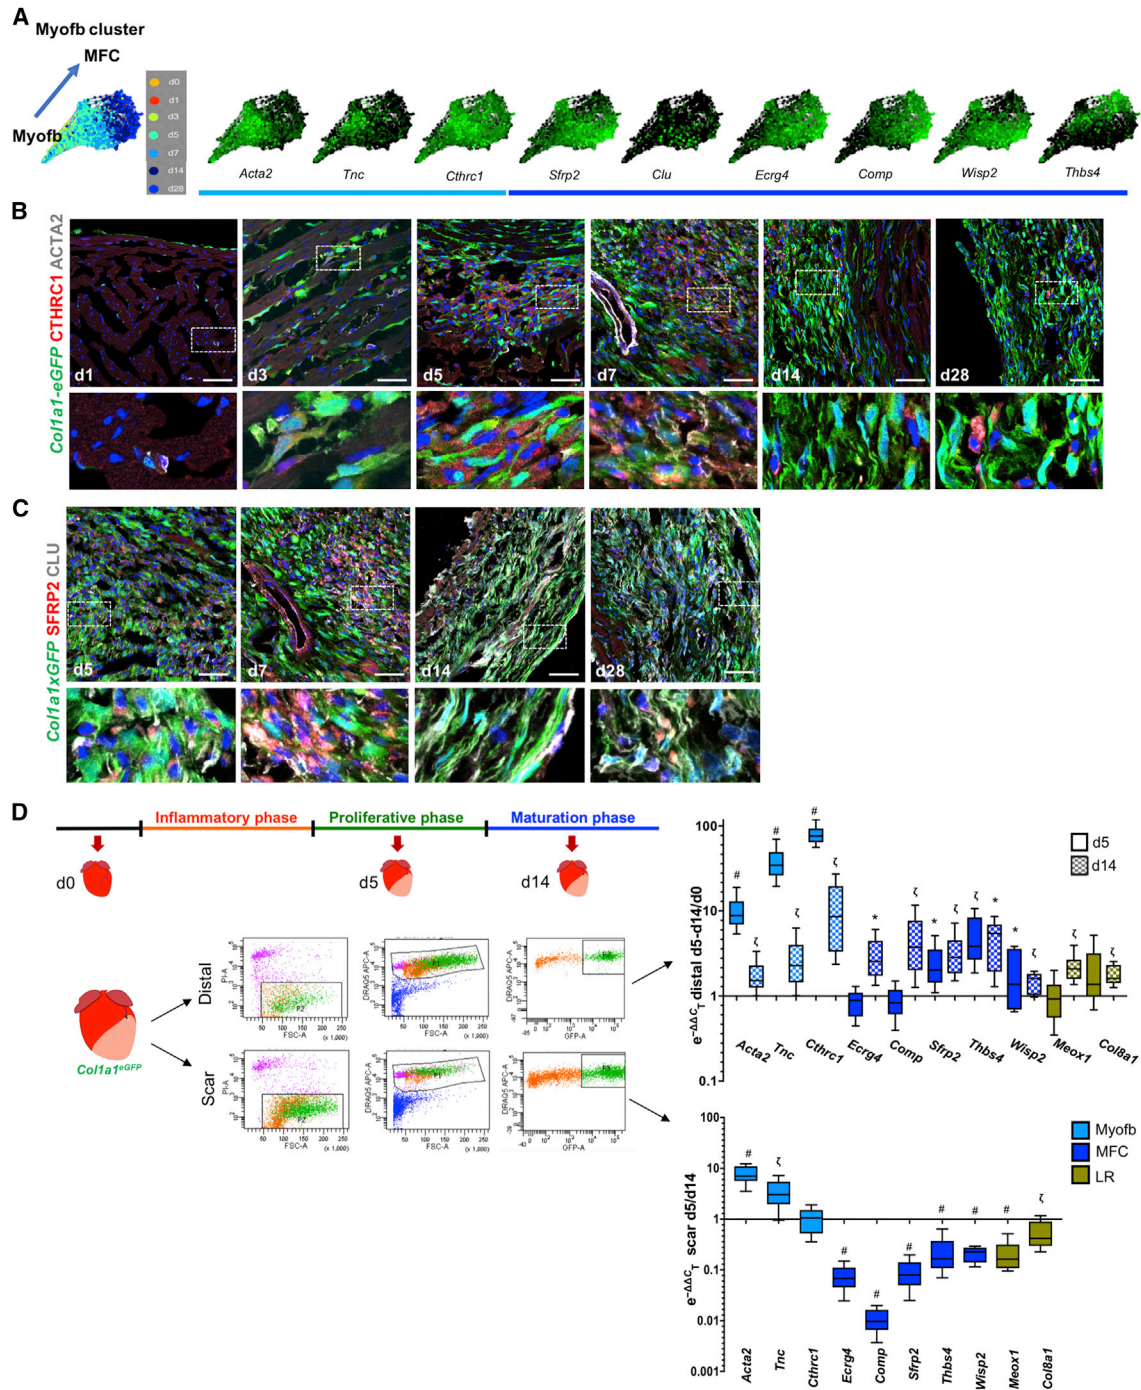

**Figure 5. Contribution of Myofibroblasts (*Myofb*), Matrifibrocytes (*MFCs*), and Late Response Fibroblasts (*LR*) to Ventricular Remodeling Post-MI**

(A) knn SPRING visualization of the *Myofb* cluster identified from analysis of the stromal aggregate across 7 time points (PC24, resolution 0.5), colored by time and by the expression of early *Myofb* marker genes (*Acta2*, *Tnc*, *Cthrc1*, light blue) and *MFC* marker genes (*Sfrp2*, *Clu*, *Ecrq4*, *Comp*, *Wisp2*, *Thbs4*).

(B and C) Confocal imaging of adult hearts from *Col1a1<sup>eGFP</sup>* mice, used as a genetic marker for stromal cells. (B) *Myofb* markers CTHRC1 (red) and ACTA2 (white) and (C) *MFC* markers SFRP2 (red) and CLU (white) at different time points post-MI.

(D) qPCR validation of additional *Myofb* (light blue), *MFC* (dark blue), and *LR* (olive green) markers on live nucleated stromal cells (PI<sup>-</sup>, DRAQ5<sup>+</sup>, EGFP<sup>+</sup>) sorted from *Col1a1<sup>eGFP</sup>* transgenic hearts. Scar or distal areas were dissected and separately processed for sorting from control (n = 3) or d5 (n = 3) and d14 (n = 3) post-MI ventricular tissue.

(legend continued on next page)

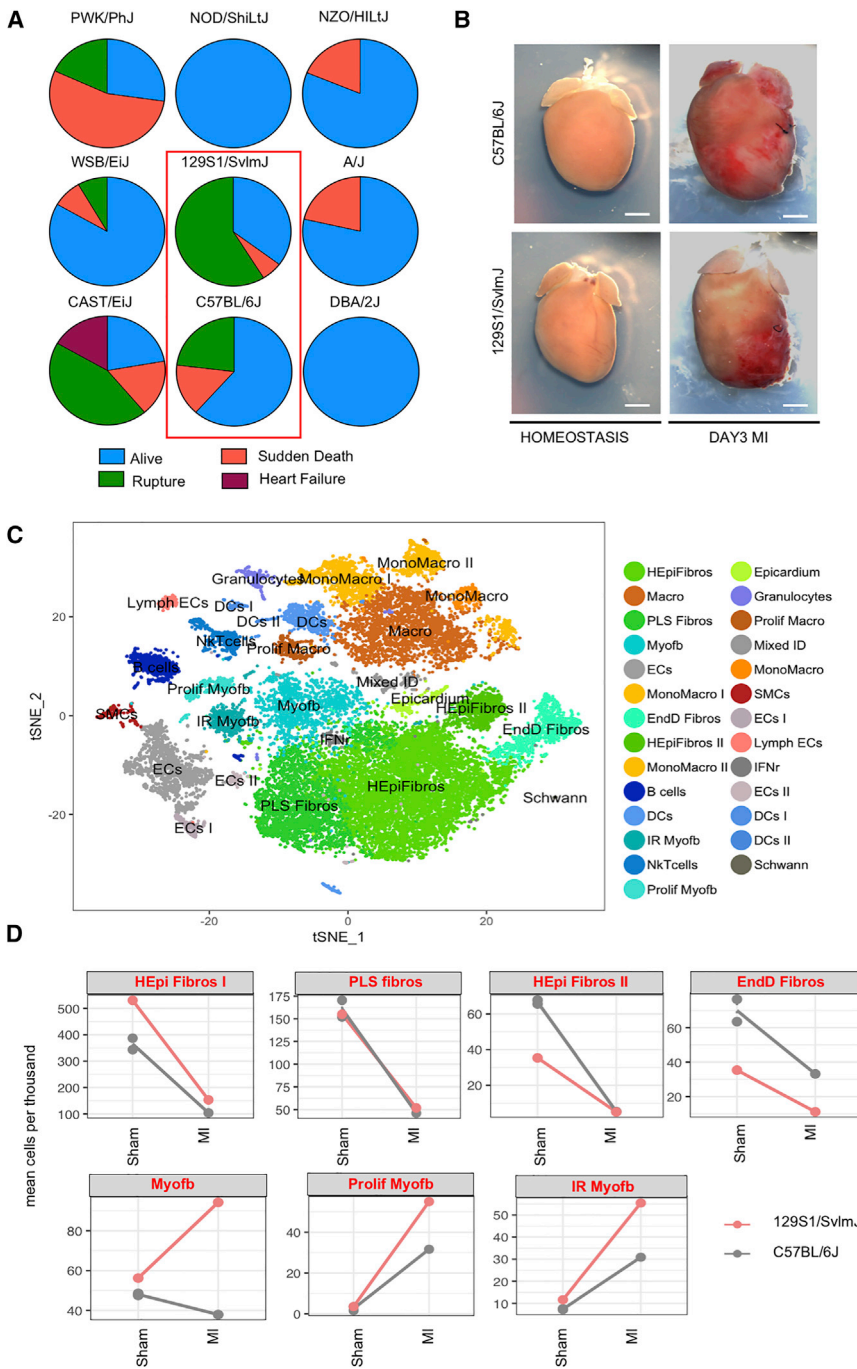

**Figure 6. Differential Rupture Rate and Stromal Cell Response across Inbred Murine Strains**

(A) Pie charts showing 1-month survival rate post-MI of 9 inbred strains with different susceptibilities to cardiovascular dysfunction, including diabetes (NOD/ShiLtJ,  $n = 13$ ), obesity (NZO/HILtJ,  $n = 16$ ), hypertension (129S1/SvlmJ,  $n = 34$ ), calcification (DBA/2J;  $n = 9$ ), dystrophic myopathy (A/J;  $n = 14$ ), and wild-derived strains (CAST/EiJ,  $n = 18$ ; WSB/EiJ,  $n = 12$  and PWK/PhJ,  $n = 11$ ). C57BL/6J was used as a control ( $n = 13$ ).

(B) Representative whole-mount images of 129S1/SvlmJ and C57BL/6J hearts at homeostasis and d3 post-MI.

(C) t-SNE plot of combined interstitial cells from C57BL/6J and 129S1/SvlmJ hearts (B6J sham,  $n = 2$ , 4,710 cells; 129 sham, 4,213 cells; d3 MI B6J, 3,950 cells; d3 MI 129, 4,128 cells). Twenty-seven clusters were obtained using unbiased clustering.

(D) Relative ratio of various stromal cell populations in 129 and B6J hearts at d3 sham or MI (mean cells per thousand). Two B6J sham samples were used to show consistency between biological replicates.

See also Figures S5 and S6 and Table S5.

rate varied among strains, with 129 showing the highest rate of rupture (59%;  $n = 34$ ) when compared to B6J (23%;  $n = 13$ ), as previously described (Gao et al., 2005). The baseline cardiac function of both lines was similar (Figure S5), despite previous reports of higher blood pressure in 129 males (Barrick et al., 2007), attributed to the increased activity of the renin-angiotensin system (RAS) pathway (Lum et al., 2004; Wang et al., 2002), which promotes inflammation (Gao et al., 2017). Rupture occurred between d4 and d5 in B6J and d3 and d4 in 129 (Figure S5K), similar to previous reports (Gao et al., 2005) and coinciding with the transition from the inflammatory to the proliferative phase and of fibroblast state from IR to Myofb.

To understand how differences in cell composition and/or gene expression may determine the higher propensity to rupture in 129, scRNA-seq of 129 and B6J cardiac interstitial cells were compared in sham-operated mice and at d3 post-MI (Figure 6B), the crucial pre-rupture time point. Data were

NOD/ShiLtJ (prone to type 1 diabetes), NZO/HILtJ (obese), A/J (prone to muscular dystrophy), and three wild-derived strains (CAST/EiJ, WSB/EiJ, and PWK/PhJ) (Figure 6A). The mortality

rupture in 129, scRNA-seq of 129 and B6J cardiac interstitial cells were compared in sham-operated mice and at d3 post-MI (Figure 6B), the crucial pre-rupture time point. Data were

Data are summarized as box and whisker plots, indicating the median value (black bar inside box), 25th and 75th percentiles (bottom and top of box, respectively), and minimum and maximum values (bottom and top whisker, respectively). Statistical significance ( $*p < 0.05$ ,  $^{\#}p < 0.001$ ,  $^{\zeta}p < 0.0001$ ) was calculated per each gene by two-tailed unequal variance Student's t test between sample (distal d5, distal d14, scar d5) and correspondent reference used for normalization (distal d0, scar d14). Scale bars, 50  $\mu\text{m}$ .

See also Figure S4 and Tables S3 and S4.

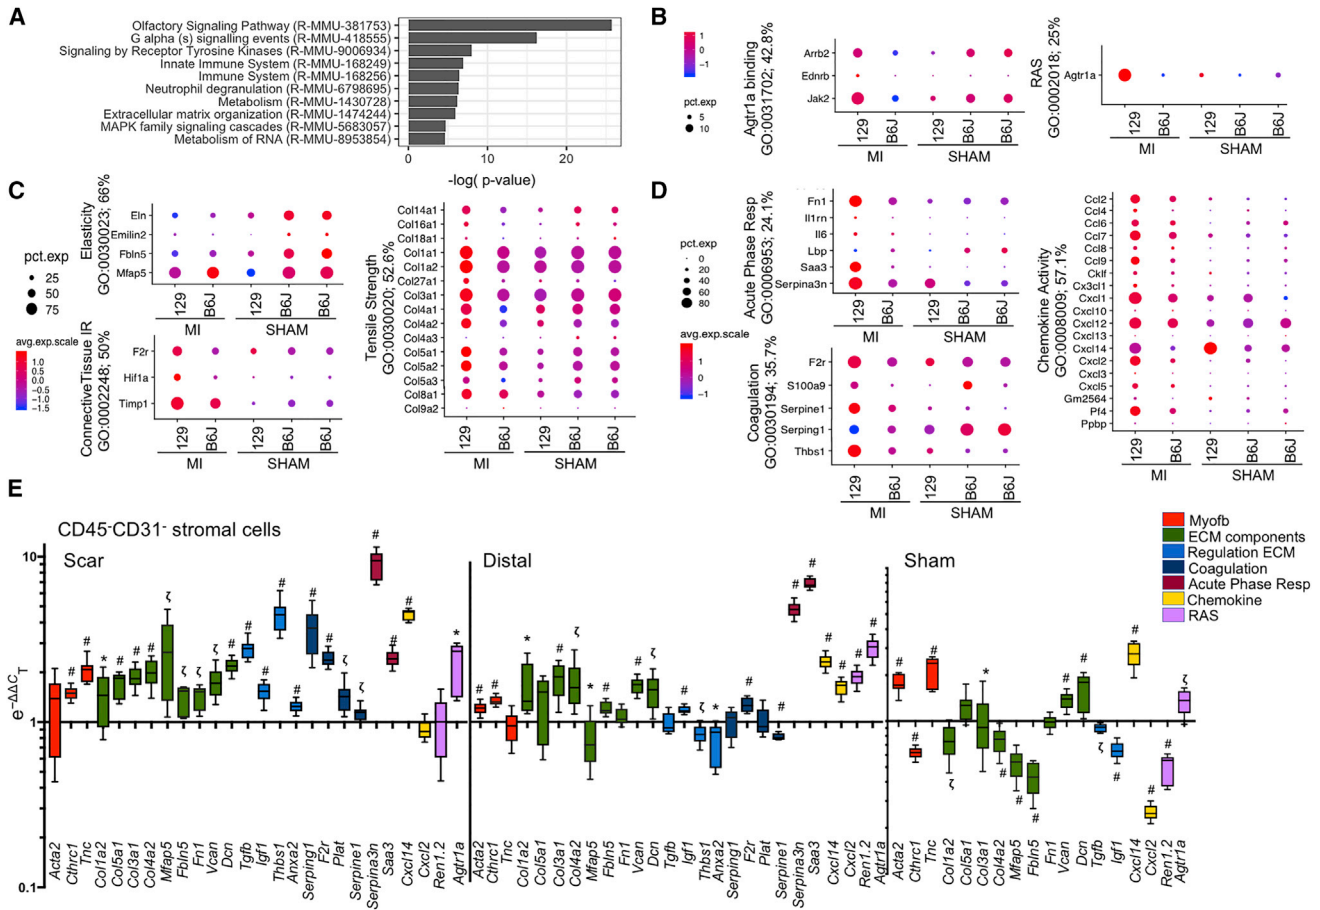

**Figure 7. Differential Pro-inflammatory and Secretory Phenotypes and ECM Composition between 129 and B6J Cardiac Stromal Cells**

(A) PANTHER Reactome pathway analysis of 3,922 differentially expressed genes (FC  $\geq 2$ ;  $p < 0.01$ ) between sham or d3 post-MI 129 and B6J stromal cells. (B–D) Dot plots showing the percentage and intensity of expression of genes within representative GO terms related to angiotensin response (B), ECM composition (C), and acute phase response and coagulation (D) across all of the samples. Two B6J sham samples were used to show consistency of change between biological replicates. Percentage scores denote the number of genes within the GO term that are represented in the list of differentially expressed genes. (E) qPCR validation of gene changes across samples. Sorted CD45<sup>-</sup>/CD31<sup>-</sup> stromal cells were isolated from adult 129 and B6J d3 sham or post-MI hearts (n = 3 biological and technical). Target genes were grouped as *Myofb* markers, ECM components, genes regulating ECM composition, coagulation, acute phase response, chemokine activity, and renin-angiotensin system (RAS).

Data are summarized as box and whisker plots, indicating the median value (black bar inside box), 25th and 75th percentiles (bottom and top of box, respectively), and minimum and maximum values (bottom and top whisker, respectively). Statistical significance (\* $p < 0.05$ ,  $\zeta p < 0.001$ , # $p < 0.0001$ ) per each gene was calculated by two-tailed unequal variance Student's t test, comparing expression values in 129 versus B6J reference samples used for normalization. See also Figures S7–S9 and Tables S6 and S7.

integrated, using Harmony, an algorithm that projects cells into a shared embedding while accounting for a biological variable—in this case, genetic background (Korsunsky et al., 2019; Figure 6C). The comparison to sham-operated mice that were subjected to a similar procedure, with chest opening and tearing of the pericardium, allowed us to focus on the differences caused by the ischemic injury alone. Post-MI 129 hearts presented relatively more *Myofb*, *ProlifMyofb*, and IR fibroblasts than B6J (Figure 6D), at the expense of other fibroblast states, which were balanced or relatively reduced in 129 (Figures S6A and S6B).

Within the stromal cluster aggregate (Figure S6C), 3,922 genes were differentially expressed between 129 and B6J as a function of strain and MI (Tables S6 and S7). PANTHER analysis defined

differences in pathways related to inflammation, receptor tyrosine kinase signaling, cell migration, ECM organization, and collagen formation between strains (Figures 7A, S7A, and S7B). Ingenuity Pathway Analysis (IPA) confirmed the enrichment in pathways related to fibrosis, adhesion, growth, and inflammation, and predicted upstream regulators, including pro-inflammatory and pro-fibrotic factors (*Tgfb1*, *Tnf*, *Ifng*, *Il1b*, *Il4*, *Agt*) (Figure S8). The expression of genes within GO categories for ossification, ECM organization, ECM structural components, and collagen-containing matrix were relatively reduced in 129 sham, but upregulated in 129 at 3d post-MI compared with B6J (Figures S7C and S7D). Within ECM components, elasticity genes (*Elm*, *Emilin2*, fibulins, microfibrillar-associated

proteins) were relatively lower in 129 irrespective of injury (Figure 7C and S7D), while tensile-strength collagens (*Fn1*, *Tnc*, *Thbs1*, *Vcan*) were upregulated in 129 post-MI. ECM-associated enzymes (*Adamts2*, *Adamts5*, *Lox*, *Lox12*, *Bmp1*) were also higher in 129 post-MI, while metalloproteinases were increased in B6J (Figures S8C and S8D), with the exception of *Mmp9*, or gelatinase B, which was previously associated with cardiac rupture (van den Borne et al., 2009), and *Mmp14*, a membrane-associated metalloprotease involved in the activation of MMP2, or gelatinase A (Jugdutt, 2003). ECM components involved in the inflammatory response (*Hif1a*, *Timp1*, *F2r*) were upregulated in 129 post-MI (Figures 7C and S7E), as well as coagulation genes (*F2r*, *Pf4*) and negative regulators of fibrinolysis (*Serpine1*, *Thbs1*) (Figure 7D). Mouse strain 129 also expressed relatively higher levels of acute phase response genes (*Tlr4*, *Serpina3n*, *Saa3*) both in sham and post-MI, and increased chemoattractant or chemokine activity post-MI, with the exception of *Cxcl14*, which was already higher in 129 sham (Figures 7D and S7E).

Among its numerous functions, the RAS is involved in ECM deposition through stimulation of the AgtR1 (Mehta and Griendling, 2007). Angiotensin II (AngII) induces a secretory phenotype in fibroblasts, stimulating the production of chemokines and ECM components (Bouzeghrane and Thibault, 2002), as well as pro-fibrotic factors, including TGF- $\beta$ 1 (Rosenkranz, 2004). AngII plays an essential role in promoting liver fibrosis by upregulating Toll-like receptor 4 (TLR4), thus enhancing downregulation of the TGF- $\beta$ 1 inhibitory pseudo-receptor BAMBI (Li et al., 2013). Consistently, our single-cell data showed a relative increase in *Agt1ra*, its downstream targets *Tlr4*, *Tgfb1*, and *Ctgf* (Figure 7B), and reduced *Bambi* in 129 stromal cells post-MI (Figures S8C and S9).

In summary, the increased susceptibility of 129 hearts to rupture is associated with persistent coagulation and impaired fibrinolysis that increases instability in the injury site, which is also supported by the higher responsiveness to angiotensin (Figures 7B, S7B, and S9). The increased production of ECM components in 129 post-MI does not confer resilience to rupture; rather, other ECM properties, such as fiber alignment, or physiological differences in baseline ECM composition, have been suggested as critical factors for heart repair following injury (Gao et al., 2002; Richardson and Holmes, 2016; Salimova et al., 2019).

## DISCUSSION

In the heart, interstitial cells of varying identities provide important regulatory functions in tissue homeostasis and repair, and an accurate evaluation of their composition is essential for defining their respective roles during pathogenesis and for devising strategies for tissue engineering and other therapeutic intervention. Our previous studies offered insights on the abundance and characteristics of different interstitial cell types in the heart, aided by isolation strategies and genetic tools to define and manipulate fibroblasts (Furtado et al., 2014), refined flow cytometry techniques (Pinto et al., 2012, 2016), and unbiased single-cell analysis (Skelly et al., 2018) in the absence of cardiomyocytes, without relying on surface markers that may overlap

different cell states and conceal heterogeneity (Ackers-Johnson et al., 2018; Jaitin et al., 2014). We also drew on recent work leveraging mouse genetic diversity for the discovery of the gene networks associated with variations in cardiovascular disease outcomes (Salimova et al., 2019).

The inclusion of a genetic reporter distinguished multiple EpiD subtypes (HEpiD, PLS, LR, IR, Myofb, MFC) whose sequential appearance defined post-MI phases, as well as an endocardial-derived cell population (EndD) expressing genes involved in endochondral ossification and Wnt signaling inhibition, whose stable presence in homeostasis persisted throughout repair. Detailed profiling of the dynamic transcriptional changes across three phases of cardiac response to infarction (inflammatory, proliferative, and maturation) revealed a rapid induction of dynamic injury-induced transitions in interstitial cell states, including an emerging fibroblast subset associated with inflammatory initiation that marked the inherited characteristics of pathogenic outcomes.

In contrast to previous scRNA-seq studies in cardiac post-ischemic injury (Farbehi et al., 2019; Kretzschmar et al., 2018), the analysis of multiple time points (d1, d3, d5, d7) immediately post-MI has provided a higher resolution of the early dynamic transitions in stromal cells that predict survival versus cardiac rupture. Whole-heart activation soon after injury identified an IR signature in fibroblasts and in a fraction of early Myofb, expressing molecular markers of oxidative stress alleviation and immunomodulation. A detailed analysis of the proliferative phase (d3, d5, d7) revealed a prevalence of Myofb and their cycling counterparts (ProlifMyofb) and a phagocytic population with mixed fibroblastic-myeloid identity (Arlein et al., 1998). Profiles of later post-MI stages (d14, d28) identified a population of EpiD (LR), expressing genes modulatory of TGF- $\beta$  activity and availability and regulatory of ECM components involved in tissue remodeling and pathological hypertrophy. A similar cell type (F-actin) has been recently defined as a pre-Myofb activation state in which fibrosis is inhibited (Farbehi et al., 2019). Given that LR are prevalent in the distal infarct area during the maturation phase, when Myofb are replaced by MFC derived from Acta2<sup>+</sup> cells (Fu et al., 2018), LR are most likely not direct Myofb precursors, but rather a state indicative of chronic remodeling. Our current analysis confirmed that MFCs are closely related to Myofb (Fu et al., 2018), but have reduced contractile and secretory properties, expressing different matrix components associated with late remodeling and ossification.

The early transition of IR to Myofb is likely an important step in determining reparative outcome, considering the high prevalence of cardiac rupture in 129 hearts in the early proliferative phase (d3–d4). Clear differences in the stromal compartment of 129 hearts showed a prevalence of Myofb and IR Myofb, with a stronger pro-inflammatory and secretory state, including increased production of chemokines, inflammatory signals, and ECM components, as compared to B6J hearts. This phenotype is correlated with an enhanced response to angiotensin. A high responsiveness to the RAS pathway may be due to the presence of a duplication of the Renin gene in the 129 strain, the function of which is still not completely clear (Lum et al., 2004; Wang et al., 2002). Treatments with therapeutic drugs targeting the RAS pathway cause a significant reduction in the

frequency of rupture in 129, independently from changes in blood pressure, and attributed to reduced inflammatory infiltration (Gao et al., 2017). Here, significant differences in the single-cell transcriptomic analysis, combined with bulk qPCR validation in the stromal compartment of the 129 mice, are in line with the pleiotropic functions of angiotensin, which not only regulates the recruitment of myeloid cells from the spleen (Swirski et al., 2009) but also promotes fibrosis and collagen deposition by fibroblasts (Lijnen et al., 2001; Mehta and Griendling, 2007). While it may seem paradoxical that mice with more ECM-secreting Myofb are prone to rupture, the reduced expression of collagens and ECM components conferring elasticity in 129 homeostatic hearts suggest that pre-existing scaffolds are more important than newly secreted matrices in conferring resistance to rupture (Gao et al., 2002). An alternative explanation for this phenomenon is that the quality, organization, and maturation of the matrix is more important than its pure enhanced secretion. In addition, gene expression patterns indicate that persistent coagulation and reduced fibrinolysis in 129 may contribute to the instability of the injury site.

The 129 model resembles the more common cardiac rupture of the pre-reperfusion era (type III), characterized by transmural myocardial necrosis with hemorrhagic transformation in the central region (Becker and van Mantgem, 1975). The present study pinpoints the modulation of the early transition from IR to Myofb as a critical determinant for risk of rupture and pathological remodeling in the 129 model and proffers mechanistic insights into the previously reported beneficial effects of fibrinolytic and anti-RAS therapies in these patients (Bates, 2014; Honda et al., 2014). It presents a comprehensive profile of cell types and pathways for the modulation of fibrosis as a critical intervention post-MI, providing potential targets for anti-fibrotic intervention. The detailed transcriptomic analysis of cardiac interstitial cells at different time points post-MI provides a benchmark for comparative analyses of potential differences in cell composition and dynamics of genetically diverse models with different reparative outcomes. Future mapping of the networks controlling the fibroblast IR state promises to identify specific features conferring susceptibility and resilience to cardiac rupture, enabling patient stratification and the development of precision therapies.

## STAR★METHODS

Detailed methods are provided in the online version of this paper and include the following:

- **KEY RESOURCES TABLE**
- **LEAD CONTACT AND MATERIALS AVAILABILITY**
- **EXPERIMENTAL MODEL AND SUBJECT DETAILS**
  - Animal models
- **METHOD DETAILS**
  - Myocardial infarction
  - Single Cell Isolation
  - Single-cell transcriptome barcoding and library preparation for Illumina sequencing
  - Single-cell RNA-seq data analysis
  - Tissue processing for cryosectioning
  - Immunofluorescence

- Imaging
- Flow cytometry and cell sorting for bulk RNA isolation
- RNA extraction and quantitative PCR
- **QUANTIFICATION AND STATISTICAL ANALYSIS**
- **DATA AND CODE AVAILABILITY**
  - Data resources

## SUPPLEMENTAL INFORMATION

Supplemental Information can be found online at <https://doi.org/10.1016/j.celrep.2020.02.008>.

## ACKNOWLEDGMENTS

We thank Dr. Susanne Sattler for insightful comments and Maureen Ekwebelem, intern with the Jackson Laboratory summer student program. We acknowledge the use of JAX Flow Cytometry, Microscopy, Single Cell Sequencing, and Computational Cores. JAX Cores are supported by the Jackson Laboratory Cancer Center grant (P30 CA034196). This work was further supported by the JAX Director's Innovation Fund, the British Heart Foundation, and the Leducq Foundation Transatlantic Network of Excellence in Cardiac Research.

## AUTHOR CONTRIBUTIONS

Conceptualization, E.F. and M.B.F.; Methodology, E.F., D.A.S., and M.B.F.; Software, D.A.S., M.C., V.M.P., and E.F.; Investigation, E.F., K.A.M., S.D., M.B.F., and M.W.C.; Resources, O.H.; Data Curation, D.A.S. and M.C.; Writing – Original Draft, E.F., D.A.S., and M.B.F.; Writing – Review & Editing, E.F., D.A.S., and N.A.R.; Visualization, E.F. and M.B.F.; Supervision, E.F. and M.B.F.; Project Administration, M.B.F.; Funding Acquisition, N.A.R. and M.B.F.

## DECLARATION OF INTERESTS

The authors declare no competing interests.

Received: July 28, 2019

Revised: December 8, 2019

Accepted: February 3, 2020

Published: March 3, 2020

## REFERENCES

- Ackers-Johnson, M., Tan, W.L.W., and Foo, R.S. (2018). Following hearts, one cell at a time: recent applications of single-cell RNA sequencing to the understanding of heart disease. *Nat. Commun.* 9, 4434.
- Arlein, W.J., Shearer, J.D., and Caldwell, M.D. (1998). Continuity between wound macrophage and fibroblast phenotype: analysis of wound fibroblast phagocytosis. *Am. J. Physiol.* 275, R1041–R1048.
- Barrick, C.J., Rojas, M., Schoonhoven, R., Smyth, S.S., and Threadgill, D.W. (2007). Cardiac response to pressure overload in 129S1/SvImJ and C57BL/6J mice: temporal- and background-dependent development of concentric left ventricular hypertrophy. *Am. J. Physiol. Heart Circ. Physiol.* 292, H2119–H2130.
- Bates, E.R. (2014). Reperfusion therapy reduces the risk of myocardial rupture complicating ST-elevation myocardial infarction. *J. Am. Heart Assoc.* 3, e001368.
- Baum, J., and Duffy, H.S. (2011). Fibroblasts and myofibroblasts: what are we talking about? *J. Cardiovasc. Pharmacol.* 57, 376–379.
- Becker, A.E., and van Mantgem, J.P. (1975). Cardiac tamponade. A study of 50 hearts. *Eur. J. Cardiol.* 3, 349–358.
- Bouzeqrhane, F., and Thibault, G. (2002). Is angiotensin II a proliferative factor of cardiac fibroblasts? *Cardiovasc. Res.* 53, 304–312.

- Brew, K., and Nagase, H. (2010). The tissue inhibitors of metalloproteinases (TIMPs): an ancient family with structural and functional diversity. *Biochim. Biophys. Acta* 1803, 55–71.
- Butler, A., Hoffman, P., Smibert, P., Papalexi, E., and Satija, R. (2018). Integrating single-cell transcriptomic data across different conditions, technologies, and species. *Nat. Biotechnol.* 36, 411–420.
- Chien, K.R., Frisén, J., Fritsche-Danielson, R., Melton, D.A., Murry, C.E., and Weissman, I.L. (2019). Regenerating the field of cardiovascular cell therapy. *Nat. Biotechnol.* 37, 232–237.
- Chong, J.J., Chandrakanthan, V., Xaymardan, M., Asli, N.S., Li, J., Ahmed, I., Heffernan, C., Menon, M.K., Scarlett, C.J., Rashidianfar, A., et al. (2011). Adult cardiac-resident MSC-like stem cells with a proepicardial origin. *Cell Stem Cell* 9, 527–540.
- Cunnington, R.H., Northcott, J.M., Ghavami, S., Filomeno, K.L., Jahan, F., Kavosh, M.S., Davies, J.J., Wigle, J.T., and Dixon, I.M. (2014). The Ski-Zeb2-Meox2 pathway provides a novel mechanism for regulation of the cardiac myofibroblast phenotype. *J. Cell Sci.* 127, 40–49.
- De, S.K., McMaster, M.T., and Andrews, G.K. (1990). Endotoxin induction of murine metallothionein gene expression. *J. Biol. Chem.* 265, 15267–15274.
- del Monte, G., Casanova, J.C., Guadix, J.A., MacGrogan, D., Burch, J.B., Pérez-Pomares, J.M., and de la Pompa, J.L. (2011). Differential Notch signaling in the epicardium is required for cardiac inflow development and coronary vessel morphogenesis. *Circ. Res.* 108, 824–836.
- Dobin, A., Davis, C.A., Schlesinger, F., Drenkow, J., Zaleski, C., Jha, S., Batut, P., Chaisson, M., and Gingeras, T.R. (2013). STAR: ultrafast universal RNA-seq aligner. *Bioinformatics* 29, 15–21.
- Dong, K., Guo, X., Chen, W., Hsu, A.C., Shao, Q., Chen, J.F., and Chen, S.Y. (2018). Mesenchyme homeobox 1 mediates transforming growth factor- $\beta$  (TGF- $\beta$ )-induced smooth muscle cell differentiation from mouse mesenchymal progenitors. *J. Biol. Chem.* 293, 8712–8719.
- Duerr, G.D., Dewald, D., Schmitz, E.J., Verfuether, L., Keppel, K., Peigney, C., Ghanem, A., Welz, A., and Dewald, O. (2016). Metallothioneins 1 and 2 Modulate Inflammation and Support Remodeling in Ischemic Cardiomyopathy in Mice. *Mediators Inflamm.* 2016, 7174127.
- Farbehi, N., Patrick, R., Dorison, A., Xaymardan, M., Janbandhu, V., Wystub-Lis, K., Ho, J.W.K., Nordon, R.E., and Harvey, R.P. (2019). Single-cell expression profiling reveals dynamic flux of cardiac stromal, vascular and immune cells in health and injury. *eLife* 8, e43882.
- Fernández-Borja, M., Bellido, D., Vilella, E., Olivecrona, G., and Vilaró, S. (1996). Lipoprotein lipase-mediated uptake of lipoprotein in human fibroblasts: evidence for an LDL receptor-independent internalization pathway. *J. Lipid Res.* 37, 464–481.
- Finak, G., McDavid, A., Yajima, M., Deng, J., Gersuk, V., Shalek, A.K., Slichter, C.K., Miller, H.W., McElrath, M.J., Pric, M., et al. (2015). MAST: a flexible statistical framework for assessing transcriptional changes and characterizing heterogeneity in single-cell RNA sequencing data. *Genome Biol.* 16, 278.
- Foglia, M.J., and Poss, K.D. (2016). Building and re-building the heart by cardiomyocyte proliferation. *Development* 143, 729–740.
- Forte, E., Furtado, M.B., and Rosenthal, N. (2018). The interstitium in cardiac repair: role of the immune-stromal cell interplay. *Nat. Rev. Cardiol.* 15, 601–616.
- Fu, X., Khalil, H., Kanisicak, O., Boyer, J.G., Vagnozzi, R.J., Maliken, B.D., Sargent, M.A., Prasad, V., Valiente-Alandi, I., Blaxall, B.C., and Molkentin, J.D. (2018). Specialized fibroblast differentiated states underlie scar formation in the infarcted mouse heart. *J. Clin. Invest.* 128, 2127–2143.
- Furtado, M.B., Costa, M.W., Pranoto, E.A., Salimova, E., Pinto, A.R., Lam, N.T., Park, A., Snider, P., Chandran, A., Harvey, R.P., et al. (2014). Cardiogenic genes expressed in cardiac fibroblasts contribute to heart development and repair. *Circ. Res.* 114, 1422–1434.
- Furtado, M.B., Nim, H.T., Boyd, S.E., and Rosenthal, N.A. (2016). View from the heart: cardiac fibroblasts in development, scarring and regeneration. *Development* 143, 387–397.
- Gao, X.M., Dilley, R.J., Samuel, C.S., Percy, E., Fullerton, M.J., Dart, A.M., and Du, X.J. (2002). Lower risk of postinfarct rupture in mouse heart over-expressing beta 2-adrenergic receptors: importance of collagen content. *J. Cardiovasc. Pharmacol.* 40, 632–640.
- Gao, X.M., Xu, Q., Kiriazis, H., Dart, A.M., and Du, X.J. (2005). Mouse model of post-infarct ventricular rupture: time course, strain- and gender-dependency, tensile strength, and histopathology. *Cardiovasc. Res.* 65, 469–477.
- Gao, X.M., Tsai, A., Al-Sharea, A., Su, Y., Moore, S., Han, L.P., Kiriazis, H., Dart, A.M., Murphy, A.J., and Du, X.J. (2017). Inhibition of the Renin-Angiotensin System Post Myocardial Infarction Prevents Inflammation-Associated Acute Cardiac Rupture. *Cardiovasc. Drugs Ther.* 31, 145–156.
- Gerth, J., Cohen, C.D., Hopfer, U., Lindenmeyer, M.T., Sommer, M., Gröne, H.J., and Wolf, G. (2007). Collagen type VIII expression in human diabetic nephropathy. *Eur. J. Clin. Invest.* 37, 767–773.
- Halász, K., Kassner, A., Mörgelin, M., and Heinegård, D. (2007). COMP acts as a catalyst in collagen fibrillogenesis. *J. Biol. Chem.* 282, 31166–31173.
- Hara, T., and Tanegashima, K. (2012). Pleiotropic functions of the CXC-type chemokine CXCL14 in mammals. *J. Biochem.* 151, 469–476.
- Honda, S., Asaumi, Y., Yamane, T., Nagai, T., Miyagi, T., Noguchi, T., Anzai, T., Goto, Y., Ishihara, M., Nishimura, K., et al. (2014). Trends in the clinical and pathological characteristics of cardiac rupture in patients with acute myocardial infarction over 35 years. *J. Am. Heart Assoc.* 3, e000984.
- Iqbal, S.M., Leonard, C., Regmi, S.C., De Rantere, D., Tailor, P., Ren, G., Ishida, H., Hsu, C., Abubacker, S., Pang, D.S., et al. (2016). Lubricin/Proteoglycan 4 binds to and regulates the activity of Toll-Like Receptors In Vitro. *Sci. Rep.* 6, 18910.
- Jaitin, D.A., Kenigsberg, E., Keren-Shaul, H., Elefant, N., Paul, F., Zaretsky, I., Mildner, A., Cohen, N., Jung, S., Tanay, A., and Amit, I. (2014). Massively parallel single-cell RNA-seq for marker-free decomposition of tissues into cell types. *Science* 343, 776–779.
- Jamil, S., Mousavizadeh, R., Roshan-Moniri, M., Tebbutt, S.J., McCormack, R.G., Duronio, V., and Scott, A. (2017). Angiopoietin-like 4 Enhances the Proliferation and Migration of Tendon Fibroblasts. *Med. Sci. Sports Exerc.* 49, 1769–1777.
- Jenne, D.E., and Tschopp, J. (1992). Clusterin: the intriguing guises of a widely expressed glycoprotein. *Trends Biochem. Sci.* 17, 154–159.
- Jones, S.E., and Jomary, C. (2002). Clusterin. *Int. J. Biochem. Cell Biol.* 34, 427–431.
- Jugdutt, B.I. (2003). Ventricular remodeling after infarction and the extracellular collagen matrix: when is enough enough? *Circulation* 108, 1395–1403.
- Keane, T.M., Goodstadt, L., Danecek, P., White, M.A., Wong, K., Yalcin, B., Heger, A., Agam, A., Slater, G., Goodson, M., et al. (2011). Mouse genomic variation and its effect on phenotypes and gene regulation. *Nature* 477, 289–294.
- Kittelberger, R., Davis, P.F., Flynn, D.W., and Greenhill, N.S. (1990). Distribution of type VIII collagen in tissues: an immunohistochemical study. *Connect. Tissue Res.* 24, 303–318.
- Koni, P.A., Joshi, S.K., Temann, U.A., Olson, D., Burkly, L., and Flavell, R.A. (2001). Conditional vascular cell adhesion molecule 1 deletion in mice: impaired lymphocyte migration to bone marrow. *J. Exp. Med.* 193, 741–754.
- Koo, B.H., Le Goff, C., Jungers, K.A., Vasanji, A., O’Flaherty, J., Weyman, C.M., and Apte, S.S. (2007). ADAMTS-like 2 (ADAMTSL2) is a secreted glycoprotein that is widely expressed during mouse embryogenesis and is regulated during skeletal myogenesis. *Matrix Biol.* 26, 431–441.
- Korsunsky, I., Millard, N., Fan, J., Slowikowski, K., Zhang, F., Wei, K., Baglaenko, Y., Brenner, M., Loh, P.R., and Raychaudhuri, S. (2019). Fast, sensitive and accurate integration of single-cell data with Harmony. *Nat. Methods* 16, 1289–1296.
- Kretzschmar, K., Post, Y., Bannier-Hélaouët, M., Mattiotti, A., Drost, J., Basak, O., Li, V.S.W., van den Born, M., Gunst, Q.D., Versteeg, D., et al. (2018). Profiling proliferative cells and their progeny in damaged murine hearts. *Proc. Natl. Acad. Sci. USA* 115, E12245–E12254.

- Le Goff, C., Morice-Picard, F., Dagoneau, N., Wang, L.W., Perrot, C., Crow, Y.J., Bauer, F., Flori, E., Prost-Squarcioni, C., Krakow, D., et al. (2008). ADAMTSL2 mutations in geleophysic dysplasia demonstrate a role for ADAMTS-like proteins in TGF-beta bioavailability regulation. *Nat. Genet.* **40**, 1119–1123.
- Li, Y.S., Ni, S.Y., Meng, Y., Shi, X.L., Zhao, X.W., Luo, H.H., and Li, X. (2013). Angiotensin II facilitates fibrogenic effect of TGF- $\beta$ 1 through enhancing the down-regulation of BAMBI caused by LPS: a new pro-fibrotic mechanism of angiotensin II. *PLoS One* **8**, e76289.
- Lijnen, P.J., Petrov, V.V., and Fagard, R.H. (2001). Angiotensin II-induced stimulation of collagen secretion and production in cardiac fibroblasts is mediated via angiotensin II subtype 1 receptors. *J. Renin Angiotensin Aldosterone Syst.* **2**, 117–122.
- Lopes, J., Adiguzel, E., Gu, S., Liu, S.L., Hou, G., Heximer, S., Assoian, R.K., and Bendeck, M.P. (2013). Type VIII collagen mediates vessel wall remodeling after arterial injury and fibrous cap formation in atherosclerosis. *Am. J. Pathol.* **182**, 2241–2253.
- Lu, P., Takai, K., Weaver, V.M., and Werb, Z. (2011). Extracellular matrix degradation and remodeling in development and disease. *Cold Spring Harb. Perspect. Biol.* **3**, a005058.
- Lu, J., Chatterjee, M., Schmid, H., Beck, S., and Gawaz, M. (2016). CXCL14 as an emerging immune and inflammatory modulator. *J. Inflamm. (Lond.)* **13**, 1.
- Lu, D., Wang, J., Li, J., Guan, F., Zhang, X., Dong, W., Liu, N., Gao, S., and Zhang, L. (2018). Meox1 accelerates myocardial hypertrophic decompensation through Gata4. *Cardiovasc. Res.* **114**, 300–311.
- Lum, C., Shesely, E.G., Potter, D.L., and Beierwaltes, W.H. (2004). Cardiovascular and renal phenotype in mice with one or two renin genes. *Hypertension* **43**, 79–86.
- Macosko, E.Z., Basu, A., Satija, R., Nemes, J., Shekhar, K., Goldman, M., Tirosh, I., Bialas, A.R., Kamitaki, N., Martersteck, E.M., et al. (2015). Highly Parallel Genome-wide Expression Profiling of Individual Cells Using Nanoliter Droplets. *Cell* **161**, 1202–1214.
- Madisen, L., Zwingman, T.A., Sunkin, S.M., Oh, S.W., Zariwala, H.A., Gu, H., Ng, L.L., Palmiter, R.D., Hawrylycz, M.J., Jones, A.R., et al. (2010). A robust and high-throughput Cre reporting and characterization system for the whole mouse brain. *Nat. Neurosci.* **13**, 133–140.
- McGinnis, C.S., Murrow, L.M., and Gartner, Z.J. (2019). DoubletFinder: Doublet Detection in Single-Cell RNA Sequencing Data Using Artificial Nearest Neighbors. *Cell Syst.* **8**, 329–337.e4.
- Mehta, P.K., and Griendling, K.K. (2007). Angiotensin II cell signaling: physiological and pathological effects in the cardiovascular system. *Am. J. Physiol. Cell Physiol.* **292**, C82–C97.
- Mi, H., Muruganujan, A., Ebert, D., Huang, X., and Thomas, P.D. (2019). PANTHER version 14: more genomes, a new PANTHER GO-slim and improvements in enrichment analysis tools. *Nucleic Acids Res.* **47** (D1), D419–D426.
- Mirotsov, M., Zhang, Z., Deb, A., Zhang, L., Gnecci, M., Noiseux, N., Mu, H., Pachori, A., and Dzau, V. (2007). Secreted frizzled related protein 2 (Sfrp2) is the key Akt-mesenchymal stem cell-released paracrine factor mediating myocardial survival and repair. *Proc. Natl. Acad. Sci. USA* **104**, 1643–1648.
- Oh, H., Bradfute, S.B., Gallardo, T.D., Nakamura, T., Gaussen, V., Mishina, Y., Pocius, J., Michael, L.H., Behringer, R.R., Garry, D.J., et al. (2003). Cardiac progenitor cells from adult myocardium: homing, differentiation, and fusion after infarction. *Proc. Natl. Acad. Sci. USA* **100**, 12313–12318.
- Park, S.Y., Lee, S.J., Cho, H.J., Kim, T.W., Kim, J.T., Kim, J.W., Lee, C.H., Kim, B.Y., Yeom, Y.I., Lim, J.S., et al. (2016). Dehydropeptidase 1 promotes metastasis through regulation of E-cadherin expression in colon cancer. *Oncotarget* **7**, 9501–9512.
- Pinto, A.R., Paolicelli, R., Salimova, E., Gospocic, J., Slonimsky, E., Bilbao-Cortes, D., Godwin, J.W., and Rosenthal, N.A. (2012). An abundant tissue macrophage population in the adult murine heart with a distinct alternatively-activated macrophage profile. *PLoS One* **7**, e36814.
- Pinto, A.R., Ilinykh, A., Ivey, M.J., Kuwabara, J.T., D'Antoni, M.L., Debuque, R., Chandran, A., Wang, L., Arora, K., Rosenthal, N.A., and Tallquist, M.D. (2016). Revisiting Cardiac Cellular Composition. *Circ. Res.* **118**, 400–409.
- R Development Core Team (2017). R: A language and environment for statistical computing (R Foundation for Statistical Computing).
- Regn, M., Laggerbauer, B., Jentzsch, C., Ramanujam, D., Ahles, A., Sichler, S., Calzada-Wack, J., Koenen, R.R., Braun, A., Nieswandt, B., and Engelhardt, S. (2016). Peptidase inhibitor 16 is a membrane-tethered regulator of chemerin processing in the myocardium. *J. Mol. Cell. Cardiol.* **99**, 57–64.
- Richardson, W.J., and Holmes, J.W. (2016). Emergence of Collagen Orientation Heterogeneity in Healing Infarcts and an Agent-Based Model. *Biophys. J.* **110**, 2266–2277.
- Rosenkranz, S. (2004). TGF-beta1 and angiotensin networking in cardiac remodeling. *Cardiovasc. Res.* **63**, 423–432.
- Ruiz-Villalba, A., Mattiotti, A., Gunst, Q.D., Cano-Ballesteros, S., van den Hoff, M.J., and Ruijter, J.M. (2017). Reference genes for gene expression studies in the mouse heart. *Sci. Rep.* **7**, 24.
- Salimova, E., Nowak, K.J., Estrada, A.C., Furtado, M.B., McNamara, E., Nguyen, Q., Balmer, L., Preuss, C., Holmes, J.W., Ramalison, M., et al. (2019). Variable outcomes of human heart attack recapitulated in genetically diverse mice. *NPJ Regen. Med.* **4**, 5.
- Schindelin, J., Arganda-Carreras, I., Frise, E., Kaynig, V., Longair, M., Pietzsch, T., Preibisch, S., Rueden, C., Saalfeld, S., Schmid, B., et al. (2012). Fiji: an open-source platform for biological-image analysis. *Nat. Methods* **9**, 676–682.
- Skelly, D.A., Squiers, G.T., McLellan, M.A., Bolisetty, M.T., Robson, P., Rosenthal, N.A., and Pinto, A.R. (2018). Single-Cell Transcriptional Profiling Reveals Cellular Diversity and Intercommunication in the Mouse Heart. *Cell Rep.* **22**, 600–610.
- Smith, C.L., Baek, S.T., Sung, C.Y., and Tallquist, M.D. (2011). Epicardial-derived cell epithelial-to-mesenchymal transition and fate specification require PDGF receptor signaling. *Circ. Res.* **108**, e15–e26.
- Smith, S.W., Croft, A.P., Morris, H.L., Naylor, A.J., Huso, D.L., Isacke, C.M., Savage, C.O., and Buckley, C.D. (2015). Genetic Deletion of the Stromal Cell Marker CD248 (Endosialin) Protects against the Development of Renal Fibrosis. *Nephron* **131**, 265–277.
- Soneson, C., and Robinson, M.D. (2018). Bias, robustness and scalability in single-cell differential expression analysis. *Nat. Methods* **15**, 255–261.
- Subramanian Vignesh, K., and Deepe, G.S., Jr. (2017). Metallothioneins: Emerging Modulators in Immunity and Infection. *Int. J. Mol. Sci.* **18**, E2197.
- Suchanski, J., Tejchman, A., Zacharski, M., Piotrowska, A., Grzegorzolka, J., Chodaczek, G., Nowinska, K., Rys, J., Dziegiel, P., Kieda, C., and Ugorski, M. (2017). Podoplanin increases the migration of human fibroblasts and affects the endothelial cell network formation: A possible role for cancer-associated fibroblasts in breast cancer progression. *PLoS One* **12**, e0184970.
- Swirski, F.K., Nahrendorf, M., Etzrodt, M., Wildgruber, M., Cortez-Retamozo, V., Panizzi, P., Figueiredo, J.L., Kohler, R.H., Chudnovskiy, A., Waterman, P., et al. (2009). Identification of splenic reservoir monocytes and their deployment to inflammatory sites. *Science* **325**, 612–616.
- Tang, J., Li, Y., Huang, X., He, L., Zhang, L., Wang, H., Yu, W., Pu, W., Tian, X., Nie, Y., et al. (2018). Fate Mapping of Sca1<sup>+</sup> Cardiac Progenitor Cells in the Adult Mouse Heart. *Circulation* **138**, 2967–2969.
- Teo, Z., Chan, J.S.K., Chong, H.C., Sng, M.K., Choo, C.C., Phua, G.Z.M., Teo, D.J.R., Zhu, P., Choong, C., Wong, M.T.C., and Tan, N.S. (2017). Angiotensin-like 4 induces a  $\beta$ -catenin-mediated upregulation of ID3 in fibroblasts to reduce scar collagen expression. *Sci. Rep.* **7**, 6303.
- Terao, M., Tani, M., Itoi, S., Yoshimura, T., Hamasaki, T., Murota, H., and Katayama, I. (2014). 11 $\beta$ -hydroxysteroid dehydrogenase 1 specific inhibitor increased dermal collagen content and promotes fibroblast proliferation. *PLoS One* **9**, e93051.
- Thygesen, K., Alpert, J.S., Jaffe, A.S., Chaitman, B.R., Bax, J.J., Morrow, D.A., and White, H.D.; Executive Group on behalf of the Joint European Society of Cardiology (ESC)/American College of Cardiology (ACC)/American Heart Association (AHA)/World Heart Federation (WHF) Task Force for the Universal

- Definition of Myocardial Infarction (2018). Fourth Universal Definition of Myocardial Infarction (2018). *Circulation* 138, e618–e651.
- van den Borne, S.W., Cleutjens, J.P., Hanemaaijer, R., Creemers, E.E., Smits, J.F., Daemen, M.J., and Blankesteijn, W.M. (2009). Increased matrix metalloproteinase-8 and -9 activity in patients with infarct rupture after myocardial infarction. *Cardiovasc. Pathol.* 18, 37–43.
- van Nieuwenhoven, F.A., Munts, C., Op't Veld, R.C., González, A., Díez, J., Heymans, S., Schroen, B., and van Bilsen, M. (2017). Cartilage intermediate layer protein 1 (CILP1): a novel mediator of cardiac extracellular matrix remodeling. *Sci. Rep.* 7, 16042.
- Villani, A.C., Satija, R., Reynolds, G., Sarkizova, S., Shekhar, K., Fletcher, J., Griesbeck, M., Butler, A., Zheng, S., Lazo, S., et al. (2017). Single-cell RNA-seq reveals new types of human blood dendritic cells, monocytes, and progenitors. *Science* 356, eaah4573.
- Wang, Q., Hummler, E., Nussberger, J., Clément, S., Gabbiani, G., Brunner, H.R., and Burnier, M. (2002). Blood pressure, cardiac, and renal responses to salt and deoxycorticosterone acetate in mice: role of Renin genes. *J. Am. Soc. Nephrol.* 13, 1509–1516.
- Weinreb, C., Wolock, S., and Klein, A.M. (2018). SPRING: a kinetic interface for visualizing high dimensional single-cell expression data. *Bioinformatics* 34, 1246–1248.
- Wessels, A., van den Hoff, M.J., Adamo, R.F., Phelps, A.L., Lockhart, M.M., Sauls, K., Briggs, L.E., Norris, R.A., van Wijk, B., Perez-Pomares, J.M., et al. (2012). Epicardially derived fibroblasts preferentially contribute to the parietal leaflets of the atrioventricular valves in the murine heart. *Dev. Biol.* 366, 111–124.
- Witke, W., Sharpe, A.H., Hartwig, J.H., Azuma, T., Stossel, T.P., and Kwiatkowski, D.J. (1995). Hemostatic, inflammatory, and fibroblast responses are blunted in mice lacking gelsolin. *Cell* 81, 41–51.
- Xie, T., Wang, Y., Deng, N., Huang, G., Taghavifar, F., Geng, Y., Liu, N., Kulur, V., Yao, C., Chen, P., et al. (2018). Single-Cell Deconvolution of Fibroblast Heterogeneity in Mouse Pulmonary Fibrosis. *Cell Rep.* 22, 3625–3640.
- Yata, Y., Scanga, A., Gillan, A., Yang, L., Reif, S., Breindl, M., Brenner, D.A., and Rippe, R.A. (2003). DNase I-hypersensitive sites enhance alpha1(I) collagen gene expression in hepatic stellate cells. *Hepatology* 37, 267–276.
- Zhang, C.L., Zhao, Q., Liang, H., Qiao, X., Wang, J.Y., Wu, D., Wu, L.L., and Li, L. (2018). Cartilage intermediate layer protein-1 alleviates pressure overload-induced cardiac fibrosis via interfering TGF- $\beta$ 1 signaling. *J. Mol. Cell. Cardiol.* 116, 135–144.
- Zheng, G.X., Terry, J.M., Belgrader, P., Ryvkin, P., Bent, Z.W., Wilson, R., Ziraldo, S.B., Wheeler, T.D., McDermott, G.P., Zhu, J., et al. (2017). Massively parallel digital transcriptional profiling of single cells. *Nat. Commun.* 8, 14049.



## STAR★METHODS

### KEY RESOURCES TABLE

| REAGENT or RESOURCE                                                                 | SOURCE                                                                           | IDENTIFIER                                                                                                                                                      |
|-------------------------------------------------------------------------------------|----------------------------------------------------------------------------------|-----------------------------------------------------------------------------------------------------------------------------------------------------------------|
| <b>Antibodies</b>                                                                   |                                                                                  |                                                                                                                                                                 |
| Rabbit monoclonal anti-Wilms Tumor Protein                                          | Abcam                                                                            | Cat# ab89901; RRID: AB_2043201                                                                                                                                  |
| Goat polyclonal anti-mouse Dkk3                                                     | R&D Systems                                                                      | Cat# AF948; RRID: AB_355734                                                                                                                                     |
| Rabbit polyclonal anti-CTHRC1                                                       | Thermo Fisher Scientific                                                         | Cat# PA5-49638; RRID: AB_2635092                                                                                                                                |
| Mouse Monoclonal Anti- alpha-Smooth Muscle antibody                                 | Sigma-Aldrich                                                                    | Cat# A5228; RRID: AB_262054                                                                                                                                     |
| Mouse Monoclonal Anti-Metallothionein Antibody, Clone UC1MT                         | Enzo Life Sciences                                                               | Cat# ADI-SPA-550-D; RRID: AB_2039383                                                                                                                            |
| Rat monoclonal anti-CD45 (Leukocyte Common Antigen, Ly-5) antibody                  | BD Biosciences                                                                   | Cat# 550539; RRID: AB_2174426                                                                                                                                   |
| Rabbit Polyclonal anti-CLU, clone RB18701                                           | MyBioSource                                                                      | Cat# MBS9215265                                                                                                                                                 |
| Rat monoclonal anti-Sfrp2, Clone 331022                                             | R&D Systems                                                                      | Cat# MAB1169; RRID: AB_2187093                                                                                                                                  |
| Donkey anti-Goat IgG (H+L) Cross-Adsorbed Secondary Antibody, Alexa Fluor 568       | Thermo Fisher Scientific                                                         | Cat# A-11057; RRID: AB_2534104)                                                                                                                                 |
| Goat anti-Mouse IgG (H+L) Highly Cross-Adsorbed Secondary Antibody, Alexa Fluor 568 | Thermo Fisher Scientific                                                         | Cat# A-11031; RRID: AB_144696                                                                                                                                   |
| Goat anti-Rat IgG (H+L) Cross-Adsorbed Secondary Antibody, Alexa Fluor 647          | Thermo Fisher Scientific                                                         | Cat# A-21247; RRID: AB_141778                                                                                                                                   |
| Goat anti-Mouse IgG2a Cross-Adsorbed Secondary Antibody, Alexa Fluor 647            | Thermo Fisher Scientific                                                         | Cat# A-21241; RRID: AB_2535810                                                                                                                                  |
| Goat anti-Rabbit IgG (H+L) Cross-Adsorbed Secondary Antibody, Alexa Fluor 647       | Thermo Fisher Scientific                                                         | Cat# A-21244; RRID: AB_2535812                                                                                                                                  |
| Anti-Mouse CD32/CD16 - Purified Functional Grade; Clone 2.4G2 antibody              | Leinco Technologies                                                              | Cat# C381; RRID: AB_2737484                                                                                                                                     |
| APC/Cyanine7 anti-mouse CD45 antibody                                               | BioLegend                                                                        | Cat# 103115; RRID: AB_312980                                                                                                                                    |
| PE-Cy7 Rat Anti-Mouse CD31 Clone 390 (RUO)                                          | BD Biosciences                                                                   | Cat# 561410; RRID: AB_10612003                                                                                                                                  |
| <b>Chemicals, Peptides, and Recombinant Proteins</b>                                |                                                                                  |                                                                                                                                                                 |
| DRAQ5                                                                               | eBioscience                                                                      | Cat# 65-0880-92                                                                                                                                                 |
| Propidium Iodine                                                                    | Sigma-Aldrich                                                                    | Cat# P4864                                                                                                                                                      |
| DAPI (4',6-Diamidino-2-Phenylindole, Dihydrochloride)                               | Thermo Fisher                                                                    | Cat# D1306; RRID: AB_2629482                                                                                                                                    |
| <b>Critical Commercial Assays</b>                                                   |                                                                                  |                                                                                                                                                                 |
| 10x Chromium system using version 2 chemistry                                       | 10x Chromium                                                                     | Cat# CG00052                                                                                                                                                    |
| RNAqueous-Micro Total RNA Isolation Kit                                             | Thermo Fisher                                                                    | Cat# AM1931                                                                                                                                                     |
| SuperScript IV VILO Master Mix with ezDNase Enzyme                                  | Thermo Fisher                                                                    | Cat#11766050                                                                                                                                                    |
| Dead Cell Removal MicroBeads                                                        | Miltenyi Biotec                                                                  | Cat# 130-090-101                                                                                                                                                |
| <b>Deposited Data</b>                                                               |                                                                                  |                                                                                                                                                                 |
| Genome Reference Consortium Mouse Build 38                                          | NCBI                                                                             | GRCm38/mm10                                                                                                                                                     |
| 129 reference genome                                                                | This paper using g2gtools                                                        | N/A                                                                                                                                                             |
| Gene Ontology terms database                                                        | Mouse Genome Informatics (MGI)                                                   | <a href="http://www.informatics.jax.org/downloads/reports/gene_association.mgi.gz">http://www.informatics.jax.org/downloads/reports/gene_association.mgi.gz</a> |
| scRNaseq data from this paper                                                       | Array Express repository                                                         | ArrayExpress: E-MTAB-7895                                                                                                                                       |
| ZsGreen coding sequence                                                             |                                                                                  | RRID: Addgene_22798                                                                                                                                             |
| <b>Experimental Models: Organisms/Strains</b>                                       |                                                                                  |                                                                                                                                                                 |
| Mouse: B6.Cg-Gt(ROSA)26Sor <sup>tm6(CAG-ZsGreen1)Hze/J</sup>                        | The Jackson Laboratory                                                           | JAX: 007906                                                                                                                                                     |
| Mouse: Tg(Wt1-cre)#Jbeb                                                             | <a href="#">del Monte et al., 2011</a> ;<br><a href="#">Wessels et al., 2012</a> | MGI: 5308608                                                                                                                                                    |

(Continued on next page)

**Continued**

| REAGENT or RESOURCE                                                                                  | SOURCE                                                                     | IDENTIFIER                                                                                                                                                                                                          |
|------------------------------------------------------------------------------------------------------|----------------------------------------------------------------------------|---------------------------------------------------------------------------------------------------------------------------------------------------------------------------------------------------------------------|
| Mouse: B6.Cg-Tg(Tek-cre)12Flv/J                                                                      | The Jackson Laboratory                                                     | JAX: 004128                                                                                                                                                                                                         |
| Mouse: Tg(Col1a1-EGFP)#Dab                                                                           | <a href="#">Yata et al., 2003</a>                                          | MGI: 4458034                                                                                                                                                                                                        |
| Mouse: NZO/HILtJ                                                                                     | The Jackson Laboratory                                                     | JAX:002105                                                                                                                                                                                                          |
| Mouse: WSB/EiJ                                                                                       | The Jackson Laboratory                                                     | JAX: 001145                                                                                                                                                                                                         |
| Mouse: NOD/ShiLtJ                                                                                    | The Jackson Laboratory                                                     | JAX: 001976                                                                                                                                                                                                         |
| Mouse: 129S1/SvImJ                                                                                   | The Jackson Laboratory                                                     | JAX: 002448                                                                                                                                                                                                         |
| Mouse: PWK/PhJ                                                                                       | The Jackson Laboratory                                                     | JAX: 0003715                                                                                                                                                                                                        |
| Mouse: CAST/EiJ                                                                                      | The Jackson Laboratory                                                     | JAX: 000928                                                                                                                                                                                                         |
| Mouse: A/J                                                                                           | The Jackson Laboratory                                                     | JAX: 000646                                                                                                                                                                                                         |
| Mouse: C57BL/6J                                                                                      | The Jackson Laboratory                                                     | JAX: 000664                                                                                                                                                                                                         |
| Mouse: DBA/2J                                                                                        | The Jackson Laboratory                                                     | JAX: 000671                                                                                                                                                                                                         |
| Oligonucleotides                                                                                     |                                                                            |                                                                                                                                                                                                                     |
| Primers designed for this study; see <a href="#">STAR Methods</a> and <a href="#">Method Details</a> | This paper                                                                 | N/A                                                                                                                                                                                                                 |
| Primers for HPRT                                                                                     | <a href="#">Furtado et al., 2014</a>                                       | N/A                                                                                                                                                                                                                 |
| Primers for Rpl4                                                                                     | <a href="#">Ruiz-Villalba et al., 2017</a>                                 | N/A                                                                                                                                                                                                                 |
| Software and Algorithms                                                                              |                                                                            |                                                                                                                                                                                                                     |
| Vevo LAB software                                                                                    | FUJIFILM/VisualSonics Inc., Canada                                         | <a href="https://www.visualsonics.com/product/software/vevo-lab">https://www.visualsonics.com/product/software/vevo-lab</a>                                                                                         |
| CellRanger v2.1                                                                                      | 10x Genomics                                                               | <a href="https://support.10xgenomics.com/single-cell-gene-expression/software/pipelines/latest/installation">https://support.10xgenomics.com/single-cell-gene-expression/software/pipelines/latest/installation</a> |
| STAR aligner                                                                                         | <a href="#">Dobin et al., 2013</a>                                         | STAR; RRID:SCR_015899                                                                                                                                                                                               |
| g2gtools                                                                                             | <a href="#">Keane et al., 2011</a>                                         | <a href="https://github.com/churchill-lab/g2gtools">https://github.com/churchill-lab/g2gtools</a>                                                                                                                   |
| R version 3.4.1                                                                                      | R Development Core Team, 2017                                              | <a href="https://cran.r-project.org/bin/macosx/">https://cran.r-project.org/bin/macosx/</a>                                                                                                                         |
| Seurat software package version 2.3.4                                                                | <a href="#">Butler et al., 2018</a> ; <a href="#">Macosko et al., 2015</a> | Seurat; RRID:SCR_016341                                                                                                                                                                                             |
| SPRING                                                                                               | <a href="#">Weinreb et al., 2018</a>                                       | <a href="https://kleintools.hms.harvard.edu/tools/spring.html">https://kleintools.hms.harvard.edu/tools/spring.html</a>                                                                                             |
| DoubletFinder                                                                                        | <a href="#">McGinnis et al., 2019</a>                                      | <a href="https://github.com/chris-mcginnis-ucsf/DoubletFinder">https://github.com/chris-mcginnis-ucsf/DoubletFinder</a>                                                                                             |
| Harmony R package version 0.0.0.9000                                                                 | <a href="#">Korsunsky et al., 2019</a>                                     | <a href="https://omictools.com/harmony-2-tool">https://omictools.com/harmony-2-tool</a>                                                                                                                             |
| MAST software                                                                                        | <a href="#">Finak et al., 2015</a>                                         | MAST; RRID:SCR_016340                                                                                                                                                                                               |
| Ingenuity Pathway Analysis                                                                           | QIAGEN                                                                     | Ingenuity Pathway Analysis; RRID:SCR_008653                                                                                                                                                                         |
| Panther                                                                                              | <a href="#">Mi et al., 2019</a>                                            | PANTHER, RRID:SCR_004869                                                                                                                                                                                            |
| LAS software v4.8                                                                                    | Leica                                                                      | Leica Application Suite; RRID:SCR_016555                                                                                                                                                                            |
| Fiji version 1.0                                                                                     | <a href="#">Schindelin et al., 2012</a>                                    | Fiji, RRID:SCR_002285                                                                                                                                                                                               |
| LASX                                                                                                 | Leica                                                                      | Leica Application Suite X; RRID:SCR_013673                                                                                                                                                                          |

**LEAD CONTACT AND MATERIALS AVAILABILITY**

Further information and requests for resources and reagents should be directed to and will be fulfilled by the Lead Contact, Elvira Forte ([elvira.forte@jax.org](mailto:elvira.forte@jax.org)). This study did not generate new unique reagents.

**EXPERIMENTAL MODEL AND SUBJECT DETAILS****Animal models**

All animal procedures were approved by the JAX Institutional Animal Care and Use Committee (IACUC) under the license 16010 and comply with NIH regulations. For constitutive epicardial genetic tracing, males from the *Wt1<sup>Cre</sup>* transgenic line ([del Monte et al., 2011](#); [Wessels et al., 2012](#)) were crossed with the reporter B6.Cg-Gt(ROSA)26Sor<sup>tm6(CAG-ZsGreen1)Hze/J</sup> (named *ZsGreen<sup>fl/+</sup>* in this work; JAX

stock #007906) (Madisen et al., 2010). For constitutive endocardial genetic tracing, the same reporter was crossed with B6.Cg-Tg(Tek-cre)12Flv/J mice (*Tek<sup>Cre</sup>*; JAX stock #004128) (Koni et al., 2001). The previously described *Col1a1<sup>eGFP</sup>* transgenic mice were used as a cardiac fibroblast marker for validation experiments (Yata et al., 2003). Nine different inbred strains were subjected to myocardial infarction to evaluate the reparative outcome: NZO/HILtJ (JAX stock #002105), WSB/EiJ (JAX stock #001145), NOD/ShiLtJ (JAX stock #001976), 129S1/SvImJ (JAX stock #002448), PWK/PhJ (JAX stock #0003715), CAST/EiJ (JAX stock #000928), A/J (JAX stock #000646), C57BL/6J (JAX stock #000664) and DBA/2J (JAX stock #000671).

## METHOD DETAILS

### Myocardial infarction

Myocardial infarction was performed as previously described (Salimova et al., 2019) on young adult males (10-12-week-old.) Briefly, the left anterior descending branch of the coronary artery (LAD) was permanently ligated above branching, about 1mm below the tip of the left auricle. Only mice with > 30% left ventricular ischemia were used for analysis. The mouse thoracic cavity was then closed and sutured. Sustained release 0.05  $\mu$ g/g buprenorphine gel formulation was administered subcutaneously at the time of surgery for analgesia. Bupivacaine was administered locally to chest suture site. Mice were individually monitored daily for the first 7 days, followed by weekly monitoring until the endpoint of experiments. Survival rates were also assessed at 28 days. Myocardial rupture (days 3-5) was confirmed by necropsy. Sudden death (days 0-1) was determined by death in the absence of rupture. Heart failure was determined by assessment of body condition score (poor mobility, grooming, hunching, etc) on live animals before euthanasia. Sham surgeries were performed in the same way as infarcts, except that after pericardial tearing the animal was sutured without ligation of the coronary artery. Functional analyses were performed at baseline (before surgery) and 28 days post-surgery. Vevo 2100 ultrasound imaging system (FUJIFILM/VisualSonics Inc., Canada) was used for morphological and functional evaluation of hearts. Animals were anesthetized with isoflurane with controlled body temperature and heart rate for functional imaging. Baseline measurements were obtained using parasternal long (PSLAX) and short (SAX) axis B-mode imaging. Used parameters were endocardial and epicardial length and area in systole and diastole.

### Single Cell Isolation

The protocol for cell isolation was adapted from Chong et al. (2011). Heart ventricles were dissociated, mechanically cut into small pieces with a scalpel and subjected to two 15min digestions with 263U/ml collagenase type II (Worthington Biochemical Corporation, LS004177), under magnetic stirring at 250rpm, 37°C. The cell suspension was passed through a 40  $\mu$ m cell strainer to remove cardiomyocytes, small fragment of undigested tissue and collected on ice in a conical 50ml tube containing 2%FCS (VWR Seradigm, 97068-085) in PBS. Cells were spun at 300g for 5 min and pre-warmed red cell lysis buffer (Sigma-Aldrich, R7757) was added for 1 min to remove blood cells. After washing, cell pellets were resuspended in 200  $\mu$ L Dead Cell Removal MicroBeads (Miltenyi Biotec, 130-090-101) and incubated 10 min at room temperature in the dark. The mix of cells and beads was diluted in binding buffer (Miltenyi Biotec, 130-090-101) and an AutoMACS Separator was used to deplete dead cells bound to the magnetic beads.

After centrifugation at 400g for 5 min, cells were resuspended in 2%FCS+2mM EDTA and stained with 2 $\mu$ M DRAQ5 (eBioscience, 65-0880-92) followed by 3  $\mu$ M Propidium Iodide (Sigma-Aldrich, P4864) after 5min. Single live nucleated cells were sorted on a BD Arial with 130 $\mu$ m nozzle to minimize pressure over cells (12psi). 16-32,000 events were sorted in 0.04%BSA, centrifuged for 8min at 400g, resuspended and diluted to 320-400cells/ $\mu$ l for scRNAseq (10x Genomics).

### Single-cell transcriptome barcoding and library preparation for Illumina sequencing

Single cell capture, barcoding and library preparation were performed with the 10x Chromium system using version 2 chemistry, according to the manufacturer's protocol (10x Genomics, #CG00052). Approximately 12,000 cells were loaded into one lane of a 10x Chromium microfluidic chip. 1 channel was used per sample (11 total) on 3 chips. Following capture and lysis, cDNA was synthesized and amplified (12 cycles) as per manufacturer's protocol (10x Genomics). The amplified cDNA from each channel was used to construct an Illumina sequencing library. cDNA and libraries were checked for quality on an Agilent 4200 TapeStation, quantified by KAPA qPCR, and sequenced on an Illumina HiSeq 4000 with 150 cycle sequencing to an average depth of 46,000 reads per cell. Detailed information on the cDNA and library yield, sequencing saturation and estimated number of captured cells per sample can be found in Table S1.

### Single-cell RNA-seq data analysis

#### Processing of sequencing reads

Raw Illumina data were processed using CellRanger v2.1 (10x Genomics) to convert Illumina basecall files to FASTQ format, align sequencing reads to the appropriate genome using the STAR aligner (Dobin et al., 2013), and quantify gene expression. For cells isolated from B6J mice, the mouse reference genome (GRCm38/mm10) was used with an extra contig added to allow alignment of reads derived from transgenic ZsGreen sequence. Specifically, the sequence of the plasmid used to generate the transgenic mouse was obtained from <http://www.addgene.org/browse/sequence/162422/>. The 1680bp used sequence included the complete ZsGreen coding sequence, a downstream 589bp WPRE sequence, and the poly(A) signal. For cells isolated from 129 mice, variant calls from the Mouse Genomes Project (Keane et al., 2011) were obtained and g2gtools (<https://github.com/churchill-lab/g2gtools>)

was used to replace single nucleotide variants, insertions, and deletions in the reference genome to create a 129-specific reference genome to which reads were aligned. Individual sequencing runs were processed using the “cellranger count” command, and aggregated runs from all time points processed using the “cellranger aggr” command, specifying argument “–normalize=mapped” for depth normalization.

#### **Data quality control, normalization, clustering, and marker analysis**

The Seurat software package version 2.3.4 (Butler et al., 2018; Macosko et al., 2015) was used in R version 3.4.1 (R Development Core Team, 2017) to analyze processed scRNA-Seq data. Data from 38,555 cells that passed CellRanger’s quality control steps were obtained. 36,847 cells were retained after filtering out cells in which < 500 or > 5,000 genes were detected; > 10% of reads derived from mitochondria; or > 15,000 UMIs were sequenced. Expression of 27,999 transcripts was quantified, of which 18,862 were expressed in at least one cell. Read counts were normalized using log transformation. Cell cycle stage was estimated and regressed out using methods implemented in Seurat (and detailed at [https://satijalab.org/seurat/v3.0/cell\\_cycle\\_vignette.html](https://satijalab.org/seurat/v3.0/cell_cycle_vignette.html)). In addition to cell cycle stage, the number of genes detected, number of UMIs detected, and percentage of mitochondrial reads were also regressed out. Variable genes were detected using the Seurat function FindVariableGenes with default parameters except  $y.cutoff = 0.5$ . Dimensionality reduction was used to explore transcriptional heterogeneity and for clustering. Specifically, PCA was used for dimensionality reduction. The first 24 principal components (PCs) were used as input for a graph-based approach to cluster cells by cell type using resolution 0.5 and as input to t-SNE for reduction to two dimensions to facilitate visualization (Villani et al., 2017).

Average expression of all genes per time-point and per cluster were obtained. Two Seurat functions were employed to identify marker genes: FindAllMarkers() to compare each cluster with all the others, and FindMarkers() for pairwise comparisons among clusters/sub-clusters. For each marker gene of clusters, the average fold change (avg\_logFC), percentage of expression in each specific cluster (pct.1), percentage of expression in all the other clusters (pct.2), and adjusted *p-value* ( $p\_val\_adj$ ) were calculated, as reported in Tables S2, S3, and S4). Avg-logFC was chosen to represent cluster-specific markers.

#### **SPRING visualization**

The used SPRING (Weinreb et al., 2018) viewer web-interface that can be found at <https://kleintools.hms.harvard.edu/tools/spring.html>. For visualization, the following parameters were used: Number of PCA dimensions = 25; Gene filtering - minimum counts = 3; Gene filtering - gene variability percentile = 80.0; Number of nearest neighbors = 5; Cell filtering - minimum counts = 0.0; Gene filtering - minimum cells = 3.0. Data matrixes of clusters of interest retrieved from the Seurat object containing all time-points were uploaded. List of genes, clustering and temporal information derived from meta data associated with the Seurat objects were also provided.

#### **Stromal cell sub-clustering**

In order to explore transcriptional heterogeneity within stromal cell clusters, the complete matrix of single cell transcriptomes and the data from selected populations (Fibroblasts I, Fibroblasts II, Fibroblasts III, Myofibroblasts and Epicardium; clusters 0,4,6,7,12) were re-normalized and clustered. Specifically, highly variable genes were identified, and the gene expression matrix was reduced in dimensionality using PCA. The first 20 PCs were selected and a graph-based clustering method implemented in Seurat was employed to cluster cells (resolution 0.5).

#### **Doublets prediction**

Cell doublets were predicted using DoubletFinder version 2.0.2 (McGinnis et al., 2019, <https://github.com/chris-mcginnis-ucsf/DoubletFinder>). DoubletFinder identifies doublets according to each cell’s gene expression proximity to artificial doublets created by averaging the transcriptional profile of randomly chosen cell pairs. DoubletFinder was run independently on each single cell library from the 7 time point experiment, to ensure that simulated doublets did not include cells from different libraries which would be impossible to observe. For all libraries, a 6% (true) doublet rate was assumed, 25 principal components were used, and the default value of 25% was used for pN (the number of generated artificial doublets expressed as a proportion of the merged real-artificial data). For each library, the PC neighborhood size  $pK$  was estimated using as the maxima of the distribution of mean-variance normalized bimodality coefficient scores, as suggested by the developers.

#### **Integration of data from different murine strains**

Single cell transcriptomes derived from mice of different genetic backgrounds require careful integration before joint analysis can be performed. In particular, the same cell type may show variability in gene expression in genetically distinct mice due to genetic regulation of gene expression. The Harmony R package version 0.0.0.9000 (Korsunsky et al., 2019) was used to integrate data from B6J and 129 cells. This software takes cells from the strains and projects them onto a shared embedding, allowing for joint clustering and analysis of the combined data. Before running Harmony, data were processed using simple criteria with the Seurat package. First, raw data matrixes were read from each 10x Chromium sample. 18,006 genes quantified in both B6J and 129 backgrounds were retained for further analysis. Second, cells were filtered using automated criteria. Cells with a very low or high number of UMIs or number of genes expressed were filtered (minimum 1000 UMI and 500 genes expressed; cells with a UMI [number of genes] count greater than three standard deviations from the mean UMI [number of genes] count of all cells were discarded). Furthermore, cells with > 30% mitochondrial reads were discarded. Third, the top 1000 variable genes were identified. Fourth, data were normalized, with signal due to the number of UMI and percent mitochondrial reads regressed out. Fifth, PCA was conducted on the complete dataset including B6J d0 - 6608 cells; B6J sham, n = 2 - 4710 cells; 129 sham - 4213 cells; d3 MI B6J - 3950 cells; d3

MI 129 - 4128 cells. To run Harmony, 80 PCs were used and the RunHarmony() function available at <https://github.com/immunogenomics/harmony> was used to integrate data with parameters: theta = 1; max.iter.harmony = 20. Finally, t-SNE was computed and cells were clustered using the graph-based clustering method implemented in Seurat.

### Differential gene expression across different strains

The MAST software (Finak et al., 2015) was used to enquire differential gene expression between strains in different conditions (sham and d3 post-MI). Tests were carried out using the MASTcpmDetRate method (Soneson and Robinson, 2018). This method tests for differences using log- and library size-normalized counts, with cellular detection rate as a covariate, and was among the most powerful and accurate methods for differential expression analysis of single cell RNA-Seq (Soneson and Robinson, 2018). Analysis of the differentially expressed genes to identify enrichment of particular biological functions was performed using Ingenuity Pathway Analysis (QIAGEN) and Panther (Mi et al., 2019). The score of each relevant GO-term was calculated as the ratio of the number of query genes associated with the term divided by the total number of genes in the genome associated with the term. Lists of mouse genes associated with each GO term were obtained from the Mouse Genome Informatics database at the link [http://www.informatics.jax.org/downloads/reports/gene\\_association.mgi.gz](http://www.informatics.jax.org/downloads/reports/gene_association.mgi.gz) (accessed January 14, 2019).

### Tissue processing for cryosectioning

Following animal euthanasia, hearts were perfused with 1x HBSS, transferred to 0.5mM KCl for cardiac cycle arrest in diastole, fixed in 4% paraformaldehyde (PFA) for 30min-1 hour at 4°C, permeated with 30% sucrose overnight at 4°C and embedded in Fisher Healthcare Tissue OCT Compound on dry ice. 8 µm cryosections were obtained using the Cryostar NX70 (Thermo Fisher).

### Immunofluorescence

Cryosections were dried for two hours at room temperature, re-fixed in 2% PFA for 10 min, permeabilized with 0.5% Triton for 15 min, blocked with 5% BSA in 50mM Glycine PBS, and stained with primary antibodies diluted in blocking solution, overnight at 4°C. The following antibodies were used: WT1 (1:100, Abcam, ab89901), DKK3 (1:100, R&D Systems, AF948), CTHRC1 (1:100, Thermo Fisher, PA5-49638), ACTA2 (1:100, Sigma Aldrich, A5228, clone 1A4), MT1a (1:100, Enzo Life Sciences, ADI-SPA-550-D), CD45 (1:100, BD Biosciences, 550539, clone 30-F11), CLU (1:100, MyBioSource, MBS9215265, clone RB18701), SFRP2 (1:50, R&D Systems, MAB1169, clone 331022). Used secondary antibodies were Invitrogen Alexa Fluor 568 Donkey anti-Goat (A-11057), Goat anti-Mouse (A-11031), Goat anti-Rabbit (A-11011); Alexa Fluor 647 Goat anti-Rat (A-21247), Goat anti-mouse IgG2a (A-21241), and Goat anti-Rabbit (A-21244) diluted 1:500 or 1:1000 in PBS. Nuclei were stained with DAPI (0.1 µg/ml, Thermo Fisher, D1306).

### Imaging

Bright field and fluorescent whole mount images of full hearts were captured on a stereo-microscope (Leica, MZ10F), equipped with a color/fluorescence camera (Leica, DFC 450c). Scale bars were added and images processed using the LAS software v4.8. Immunofluorescence images were acquired using either an upright fluorescent microscope (Zeiss, Axio Imager.Z2), equipped with X-Cite 120LED excitation source (Excelitas Technologies), using a 20x objective (Zeiss, Plan-Apochromat" 20x/0.8), and the ZEN2 software (Zeiss, blue edition) for acquisition, or using confocal imaging (SP8-AOBS, Leica) with 40x (Leica, HC PL APO 40x/1.30 Oil CS2, FWD = 0.24 mm) or 63x (Leica, HC PL APO 63x/1.40 Oil CS2, FWD = 0.14) objectives, using very-high sensitivity HyD detectors for the emission of 488, 561 and 633 lasers, and the LASX software. At least 3 independent rounds of stainings were done and images were acquired keeping same setting across all time-points used in the comparison analysis. All quantification and image processing were performed using Fiji version 1.0 (Schindelin et al., 2012). Z stacks with 0.5 µm step size were converted by Z-projection of the average intensity for each channel. Individual channels were merged and pseudo-colored.

### Flow cytometry and cell sorting for bulk RNA isolation

For qPCR validations, interstitial cells were isolated as described above, from the whole ventricles of control mice or scar area and distal area in injured mice. In experiments with *Coll1a1<sup>eGFP</sup>* mice, GFP<sup>+</sup>DRAQ5<sup>+</sup>PI<sup>-</sup> cells were sorted on Aria II with 130 µm nozzle. In absence of a fluorescent reporter (129, B6J mice), cells were first resuspended in blocking solution containing anti-mouse CD16/CD32 (1:600, Leinco Technologies, C381, clone 2.4G2) in 2% FCS 5min at RT, then stained with APC/Cyanine7 anti-mouse CD45 (1:660, BioLegend, 103115, clone 30-F11), PE-Cy7 anti-mouse CD31 (1:800, BD Biosciences, 561410, clone 390) on ice for 15min. After washing in PBS, cells were resuspended in 2%FCS+2mM EDTA and DAPI (50ng/ml) before sorting on the ArianII for DAPI<sup>+</sup>CD45<sup>+</sup>CD31<sup>-</sup> cells.

### RNA extraction and quantitative PCR

RNA was isolated from bulk sorted cells using the RNAqueous-Micro Total RNA Isolation Kit (Thermo Fisher, AM1931), according to manufacturer's instructions. cDNA synthesis was performed using the SuperScript IV VIL0 Master Mix with ezDNase Enzyme (Thermo Fisher, 11766050). qPCR reactions were performed using Power SYBR Green PCR Master Mix (Thermo Fisher, 4367659) on ViiA 7 Real-Time PCR System with 384-Well Block (Thermo Fisher). 4ng of RNA were loaded per reaction. Primers were designed using IDT primer design tool and BLAST, tested with standard curves on 4 serial 5-fold dilutions. The following primers were used: *Comp* F: 5'-ACATAGATGGCGACCGAATAC-3', R: 5'-CCTCTGGTCTGGGTTATCTTTC-3'; *Acta2* F: 5'-TCTTTCATTGGGATGGAGTCAG-3', R: 5'-GACAGGACGTTGTTAGCATAGA-3'; *Cthrc1* 5'-CCCATCGAAGCCATCATCTATC-3',

R: 5'-TCACAGAGTCCTCCACAGA-3'; *Sfrp2* F: 5'-AGAGGAAGCTCCCAAGGT-3', R: 5'-GGTGTCTCTGTTGATGTACGTTAT-3'; *Ecrp4* F: 5'-CTGGGTCCAGATGGCATAAG-3', R: 5'-GTTCTCGGCTACAGCTACATT-3'; *Wisp2* F: 5'-TTGAAGCTGGCTCCAC AAG-3'; R: 5'-GGGCATACACCATTGAGAGAAT-3'; *Meox1* F: 5'-GGGAGGATTGCATGGTACTT-3', R: 5'-CTGGTTGTCTG ACCTCTCTTT-3'; *Col8a1* F: 5'-GCTCAAGAAGCTGTTCTGTAAATC-3', R: 5'-CCAGTAGAATCGAGGACCAAAG-3'; *Tnc* F: 5'-CC AGGGTTGCCACCTATTT-3', R: 5'-GTCTAGAGGATCCCCTACTT-3'; *Thbs4* F: 5'-GCTCCTTGAGAGGTGAAAG-3', R: 5'-AA AGCTGAGAGGACCACAAG-3'; *Cxcl14* F: 5'-GCTCTTGGTGGTGACGATAA-3', R: 5'-GCTACAGCGACGTGAAGAA-3'; *Saa3* F: 5'-GCCTTCCATTGCCATCATT-3', R: 5'-CACATGTCTCTAGACCCTTGAC-3'; *Serpina3n* F: 5'-TGCAGTCTACAGAGCTGAAA CC-3', R: 5'-CAACCCTGAACATCGGGAGT-3'; *Fn1* F: 5'-TCCTGTCTACCTCACAGACTAC-3', R: 5'-GTCTACTCCACCGAACAA CAA-3'; *F2r* F: 5'-TGGAGGGTAGGGCAGTCTAC-3', R: 5'-GTGTACACGGAGGGCATGAA-3'; *Serpine1* F: 5'-TCCACAAGTCT GATGGCAGC-3', R: 5'-TGGTAGGGCAGTTCCACAAC -3'; *Plat* F: 5'-CGAAAGCTGACGTGGGAATA-3', R: 5'-GTGTGAGGT GATGTCTGTGTAG-3'; *Anxa2* F: 5'-CAAGACCAAAGGAGTGGATGAG-3', R: 5'-CTGATAGGCGAAGGCAATGT-3'; *Dcn* F: 5'-CTGGCCAATGTTCCCTCATCT-3', R: 5'-AAGGTAGACGACCTGGATATACT-3'; *Col5a1* F: 5'-CACCTTGATCCCTCGACTGTAAG-3', R: 5'-TGTTGGATGCACCCTCAAATA-3'; *Col4a2* F: 5'-ACAATCACCACCAAAGGGGA-3', R: 5'-GGAATCCATCCAGCCCATCC-3'; *Fbln5* F: 5'-TGTCTGCGTTTGCTCTATGT-3', R: 5'-GAGTATCATGCTCTCTGTCTG-3'; *Mfap5* F: 5'-AGTCTGCTTCCACAGTT TAC-3', R: 5'-GGCAAAGCTCATCTTTCATAGC-3'; *Thbs1* F: 5'-GCCTCTCCTGTGATGAACTATC -3', R: 5'-CTCTGTTCT CTCCGTCACCTT-3'; *Serpig1* F: 5'-GCTGAGAACACCAACCATAAGA-3', R: 5'-CCACTTGGCACTCAAGTAGAC-3'; *Tgfb1* F: 5'-CTGAACCAAGGAGACGGAATAC-3', R: 5'-GGGCTGATCCCGTTGATTT-3'; *Hprt1* (Furtado et al., 2014) F: 5'-GCGAGGGA GAGCGTTGGGCT-3', R: 5'-CATCATCGCTAATCAGCAGCTGGG-3'; *Rpl4* (Ruiz-Villalba et al., 2017) F: 5'-GCC GCTGGTGGTTGAAGATAA-3', R: 5'-CGTCGGTTCTCATTTTGCCC-3'.

## QUANTIFICATION AND STATISTICAL ANALYSIS

Number of biological replicates and statistical significance are specified in figures and figure legends. For Echocardiography baseline measurements of B6J (n = 14) and 129 (n = 13) strains, an average of 3 measurements of each parameter were obtained per animal (standard deviation < 0.5). To evaluate the response to MI of different inbred strains the following mice were used: NOD/ShiLtJ, n = 13, NZO/HILtJ, n = 16, 129S1/SvlmJ, n = 34, DBA/2J, n = 9, A/J, n = 14, CAST/EiJ, n = 18; WSB/EiJ, n = 12, PWK/PhJ, n = 11, C57BL/6J n = 13.

For immunostaining quantification, we used 5-6 fields per time-point and calculated mean and standard error of the mean. Unpaired, two-tailed Student's t test was used for pairwise comparison of data between groups. *P* value of less than 0.05 was considered significant. For qPCR analysis we used 3 technical replicates of 3 biological replicates. We calculated  $e^{-\Delta\Delta C_t}$ , where *e* is the efficiency of each primer pair derived from the standard curve,  $\Delta\Delta C_t$  is obtained by normalizing  $C_t$  values on the geometric mean of two housekeeping genes (*Rpl4* and *Hprt1*) over the reference sample. The median, 25th and 75th percentile, maximum and minimum values are represented with box and whisker plots. For statistical analysis, unpaired two-tailed Student's t test, which compares the relative expression values of each gene to the values of the reference sample used for normalization. *P*-value of less than 0.05 was considered significant. Excel v16.16.7 and GraphPad Prism v7.0 were used for the analysis, generation of graphs and statistics. For differential gene expression analysis between 129 and B6J, a threshold of 2-fold expression change and *P*-value  $\leq 0.01$  were used. False discovery rate (FDR)-corrected *P*-values were used for sorting the results from Panther analysis. *P*-values of overlap and Benjamini-Hochberg (B-H) corrected *P*-values were used for the upstream regulators and canonical pathway analysis respectively (Ingenuity Pathway Analysis, QIAGEN). For the Kaplan-Meier survival plot, statistical significance was calculated using the Gehan-Breslow-Wilcoxon test.

## DATA AND CODE AVAILABILITY

### Data resources

R scripts utilized in the study can be obtained upon request. The accession number for the sequencing data reported in this paper is ArrayExpress: E-MTAB-7895.

**Cell Reports, Volume 30**

**Supplemental Information**

**Dynamic Interstitial Cell Response  
during Myocardial Infarction Predicts**

**Resilience to Rupture in Genetically Diverse Mice**

**Elvira Forte, Daniel A. Skelly, Mandy Chen, Sandra Daigle, Kaesi A. Morelli, Olivia Hon, Vivek M. Philip, Mauro W. Costa, Nadia A. Rosenthal, and Milena B. Furtado**

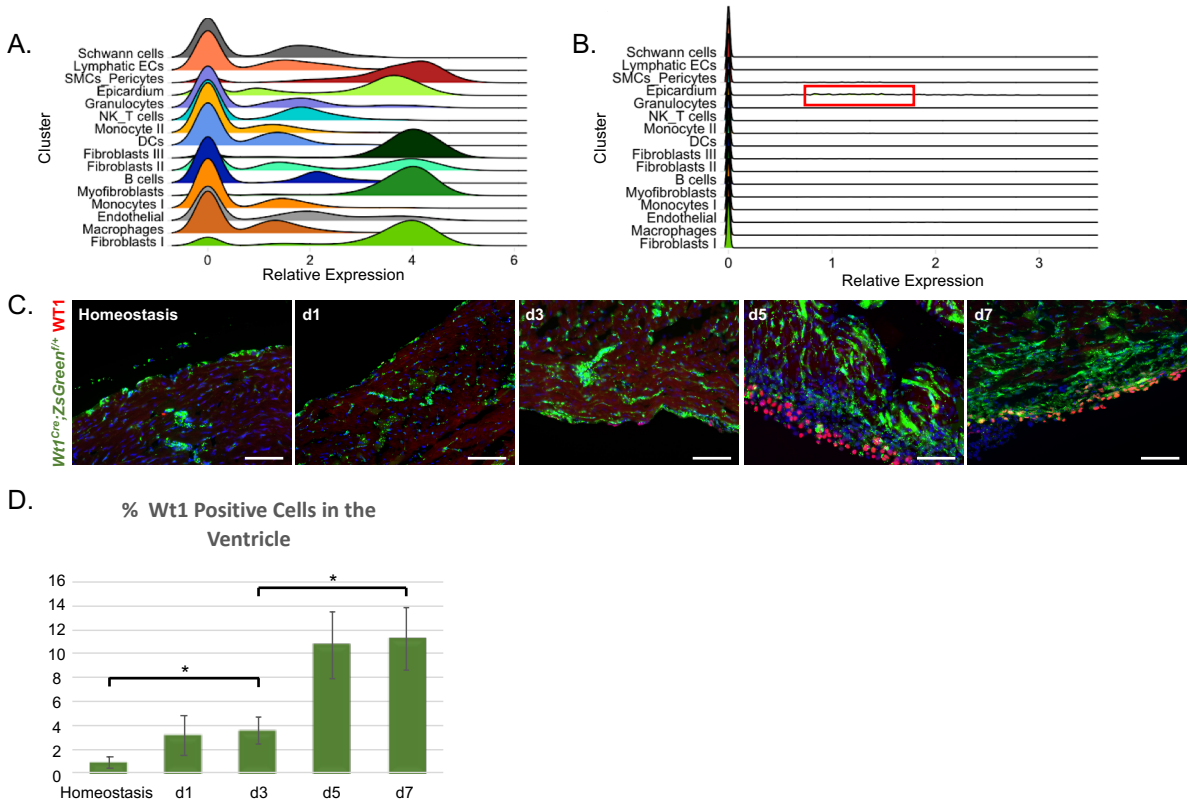

**Figure S1 *De novo* expression of *Wt1* in the epicardium post-MI.** Related to Figure 1. (A) Ridge-plot showing *ZsGreen* mRNA expression in the 16 clusters identified with Seurat from the aggregate of all 7 time-points. High *ZsGreen* levels are seen in smooth muscle cells (SMCs)\_Pericytes, epicardium, Fibroblasts type I, II, II and myofibroblasts. (B) Ridge-plot showing *Wt1* mRNA expression in all clusters. Note very low detection in the epicardium (red bracket), but no detection in other clusters. (C) Immunofluorescent staining for WT1 protein (red) on section of *Wt1<sup>Cre</sup>;ZsGreen<sup>f/+</sup>* mouse heart at homeostasis, d1, d3, d5 and d7 post-MI. WT1 is mostly detected in the activated epicardium at d7. (D) Quantification of WT1+ cells in the interstitial space of ventricles ( $n = 6$  frames per heart and time-point, including the epicardial region). The statistical significance compared to homeostasis was determined using an unpaired Student's t test ( $*p < 0.05$ ). Scale bar = 50 $\mu$ m.



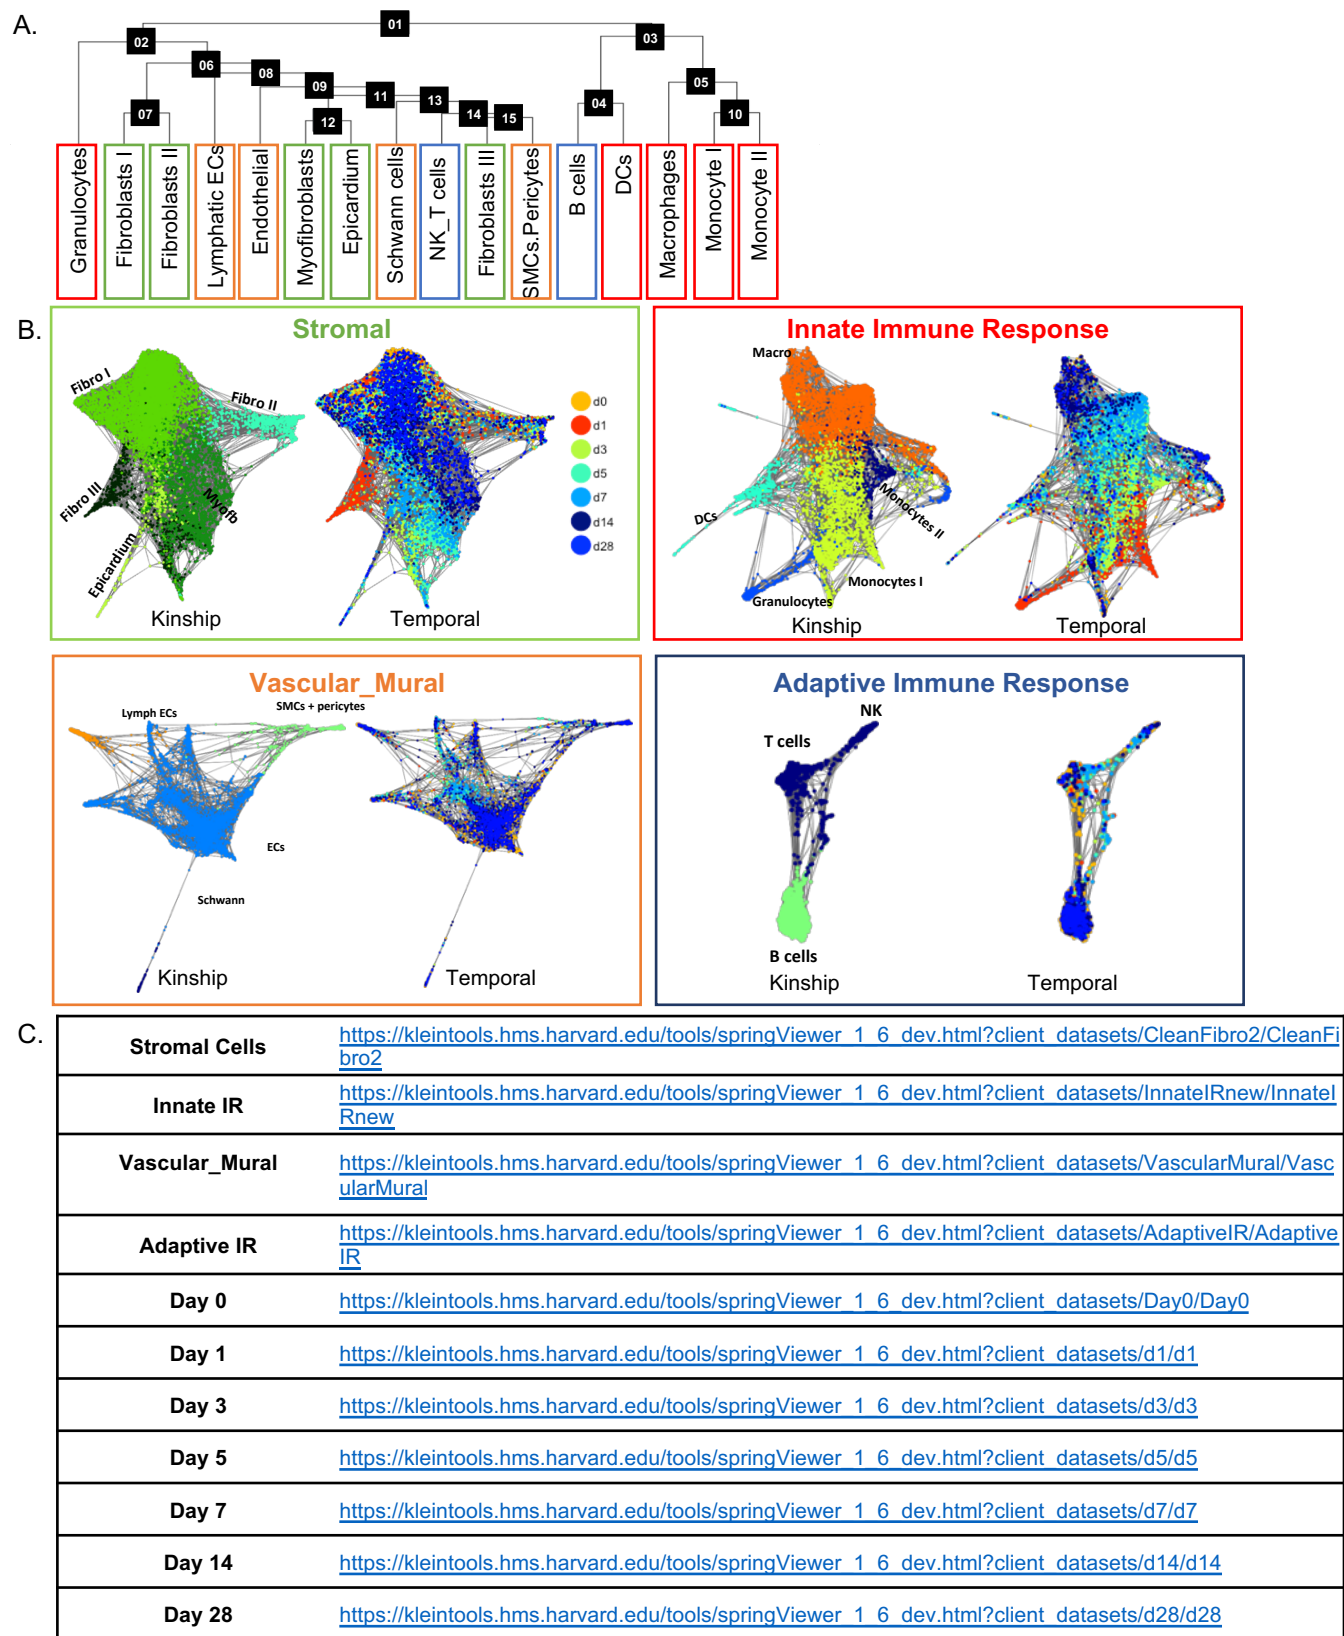

**Figure S2 Onset of new populations as a function of the repair process.** Related to Figures 1-2. (A) Transcriptome based phylogenetic tree of the 16 clusters obtained from the aggregate of interstitial cells derived from *Wt1<sup>Cre</sup>; ZsGreen<sup>f/+</sup>* mice at homeostasis, d1, d3, d5, d7, d14 and d28 post-MI. Box colors indicate lineage identity (red- innate immune response, blue – adaptive immune response; green – stromal; orange – vascular, mural). (B) SPRING k- nearest-neighbor (knn) graphs of cell populations divided by lineage, colored by cluster (Kinship) and time (Temporal). A maximum of 1,200 cells were used in each lineage aggregate per time-point. (C) Links to the SPRING kinetic visualizations for each of the aggregates in (B) and individual time points. The drop-down menu in the website, allows to choose among different types of visualization: “Default”, “Louvain Cluster”, “Type” = clusters defined with Seurat v2, “Time”. For the Stromal cell aggregate “TypeA” indicates the initial clustering (Figure1), “TypeB”, the sub-clusters (Figure2).

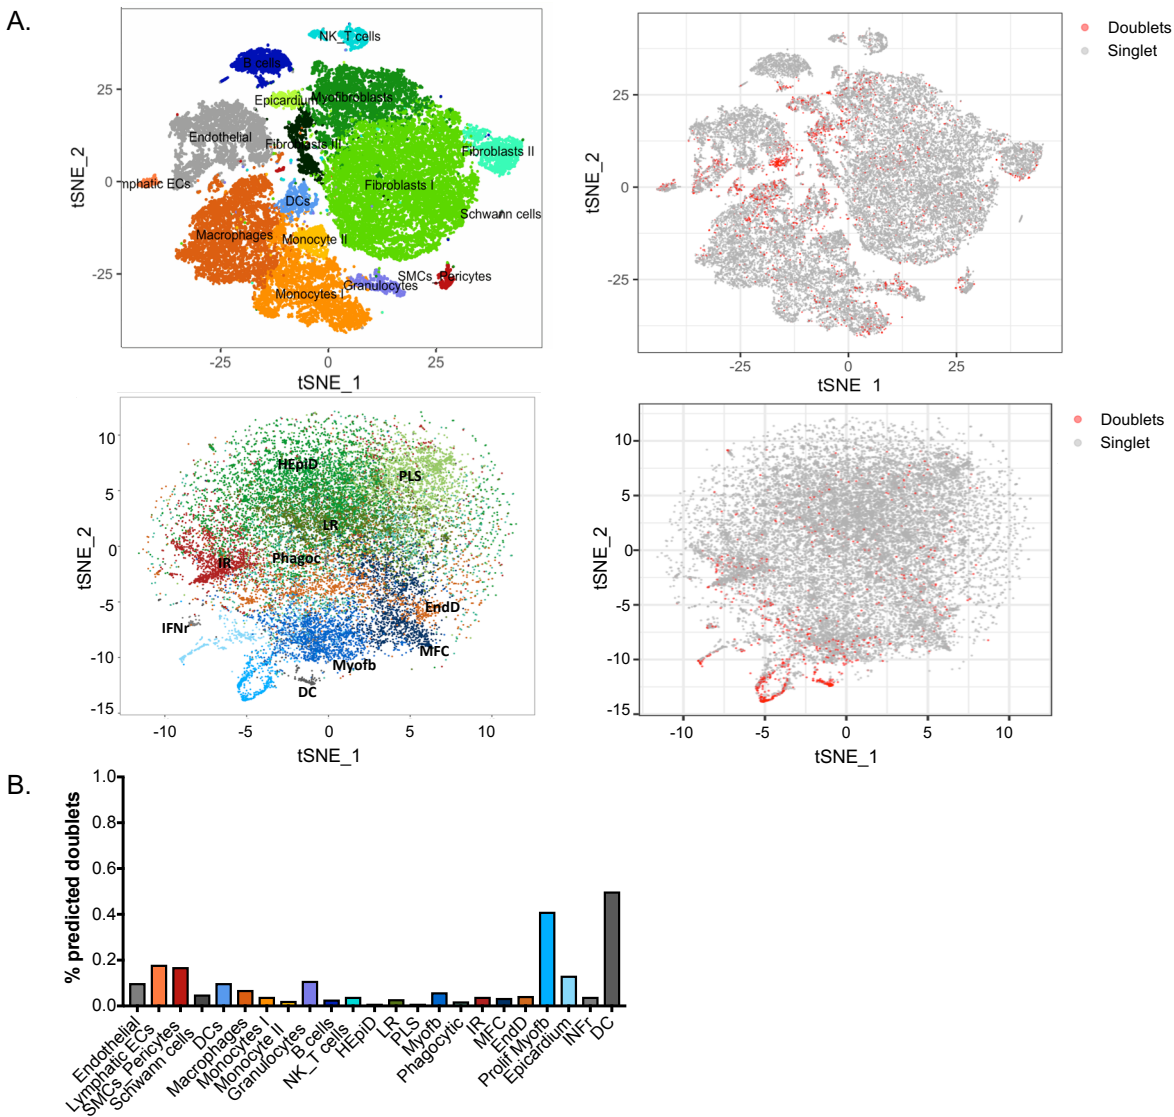

**Figure S3 Doublets prediction using DoubletFinder.** Related to Figures 1-2. (A) tSNE plots representing the distribution of predicted doublets (red on grey) across clusters (first row) and stromal cell sub-clusters (second row). (B) Bar plot showing the percentage of predicted doublets in each cluster/sub-cluster.

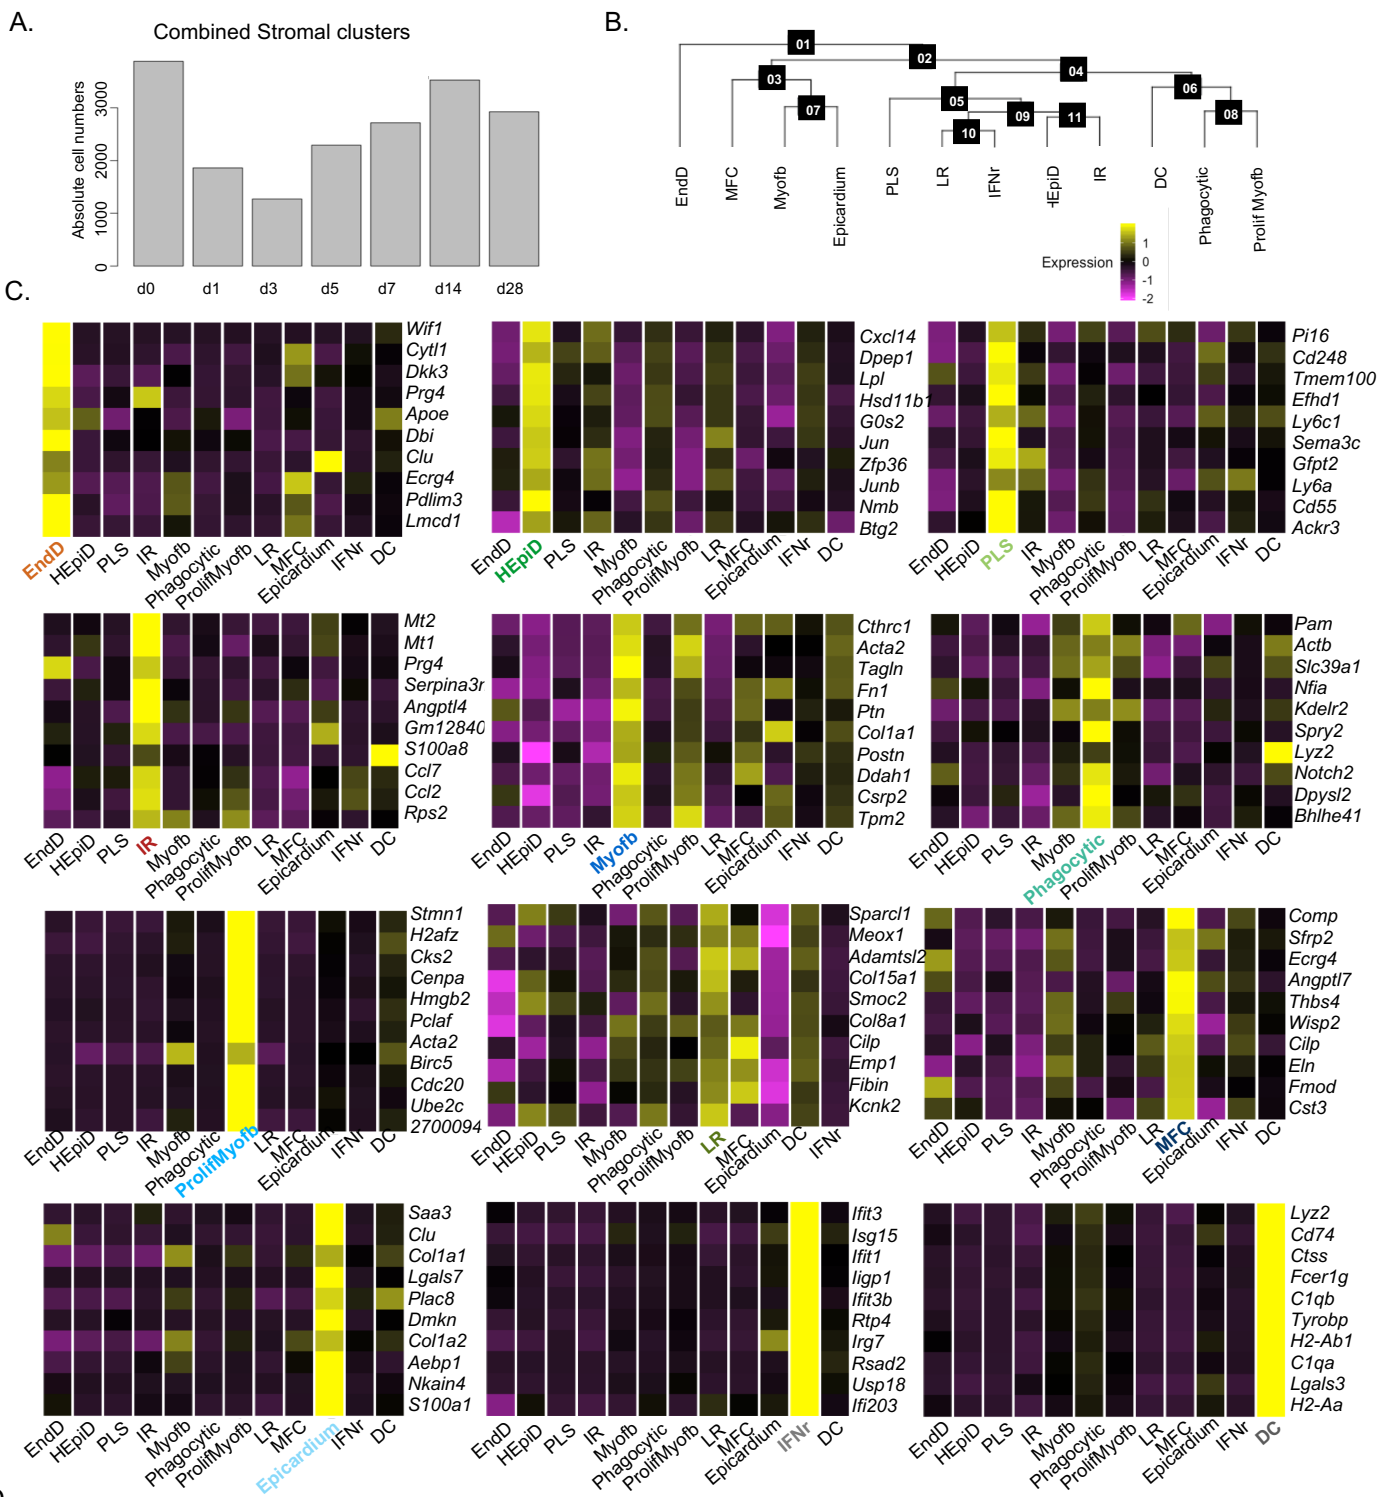

**Figure S4 Detailed analysis of stromal cell sub-populations evolving during the MI repair process.** Related to Figures 2-5. (A) Total number of cells from the stromal clusters aggregate (Fibroblasts I, II, III, Myofibroblasts, Epicardium) per time-point used for further sub-clustering with Seurat. (B) Transcriptome based phylogenetic tree of the 11 stromal cell sub-clusters (PC=20, res=0.5). Note EndD cluster node diverges from all epicardial-derived clusters. (C) Heatmaps of the top 10 differentially expressed genes per sub-cluster sorted based on average expression fold change, percentage of expression and adjusted p-value. (D) Nomenclature table explaining the names attributed to each sub-population and how they relate with previous literature.

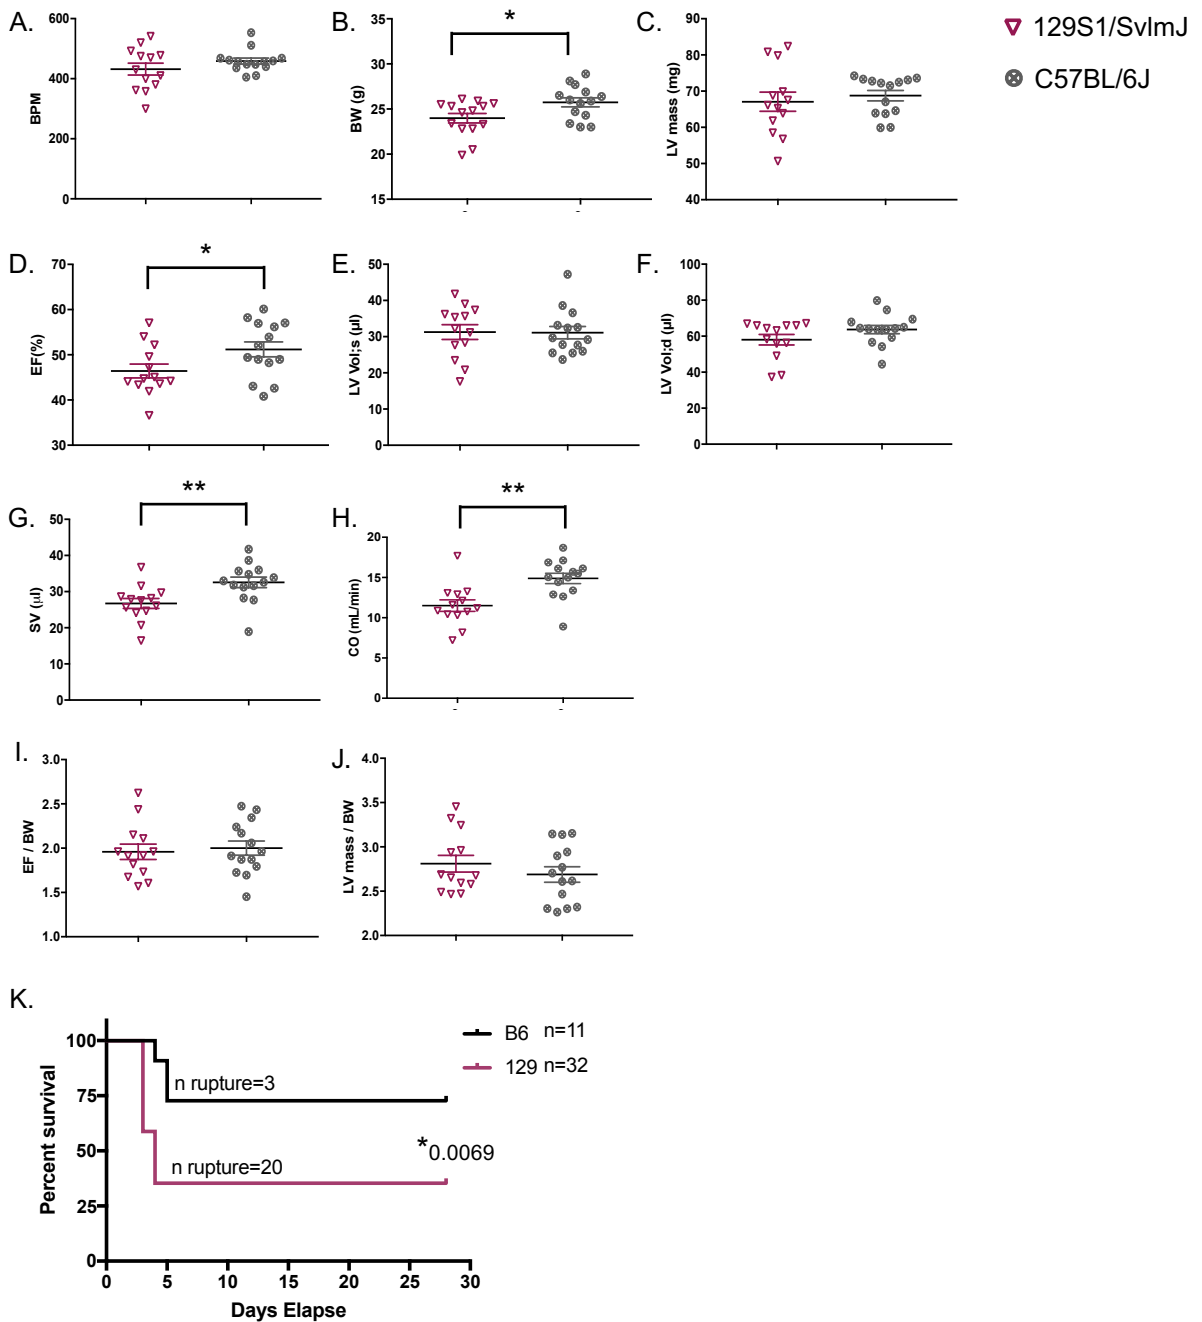

**Figure S5 Baseline cardiovascular function in 129S1/SvImJ and C57BL/6J strains before MI.** Related to Figure 6. Echocardiography was performed in 10-week-old 129 (n=13) or B6J (n=14) adult males. Heart rate range ((A) beats per minute or BMP) was controlled between strains for standardization of heart function. 129 showed slightly lower body weight ((B) BW;  $p < 0.05$ ), left ventricular mass ((C) LV mass; non-significant), ejection fraction ((D) EF;  $p < 0.05$ ), left ventricular diastolic volume ((F), LV Vol;d; non-significant), stroke volume ((G), SV;  $p < 0.01$ ) and cardiac output ((H) CO;  $p < 0.01$ ) when compared with B6J. Left ventricular systolic volume ((E) LV Vol;s; non-significant) was unaltered. EF and LV mass differences were not significant when normalized by BW (I, J). (K) Kaplan-Meier survival plot for 129 (n=32) and B6J mice (n=11). Two animals for each strain, which were lost to sudden death, were excluded from this analysis. Statistical significance was calculated using the Gehan-Breslow-Wilcoxon test.

A.

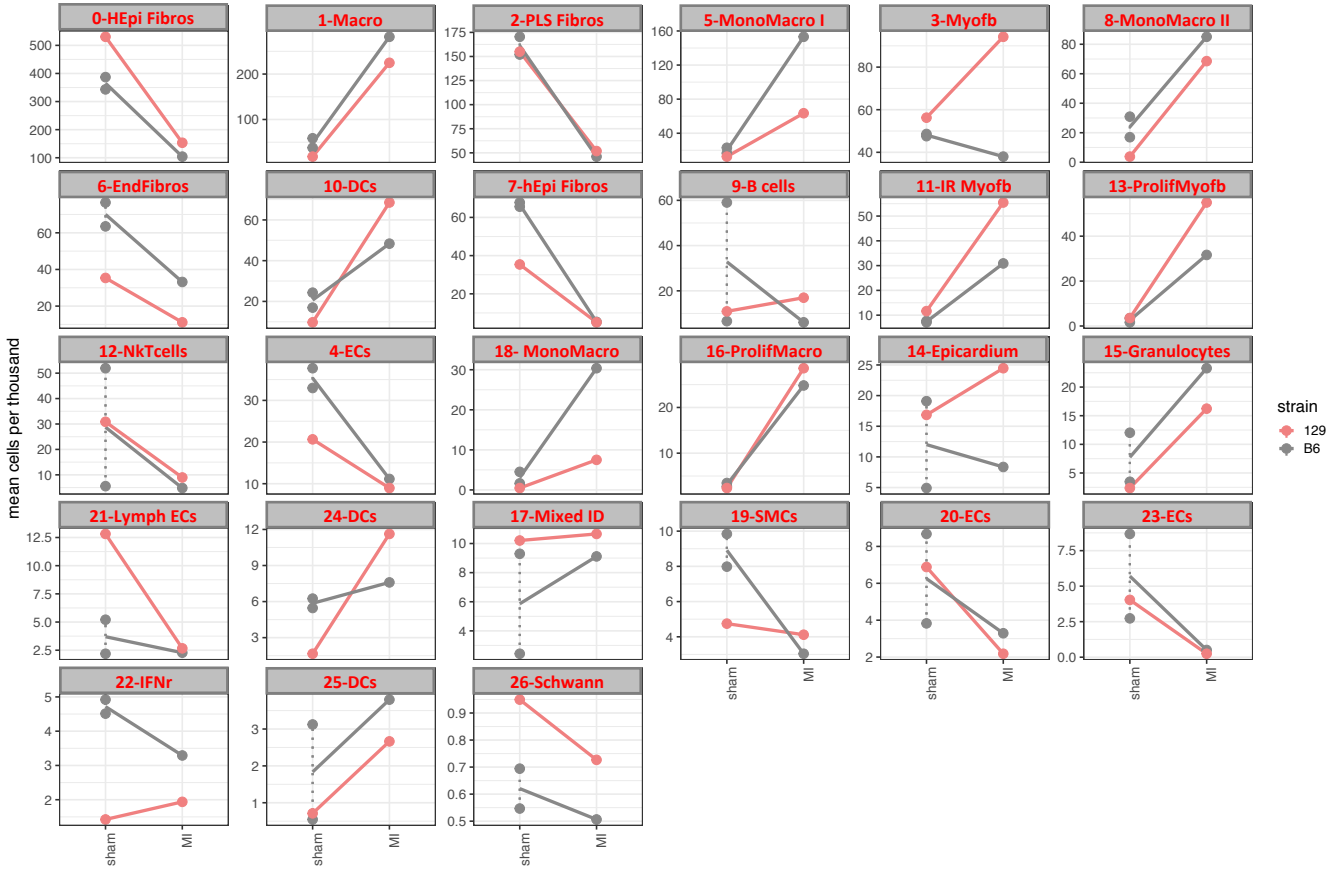

B.

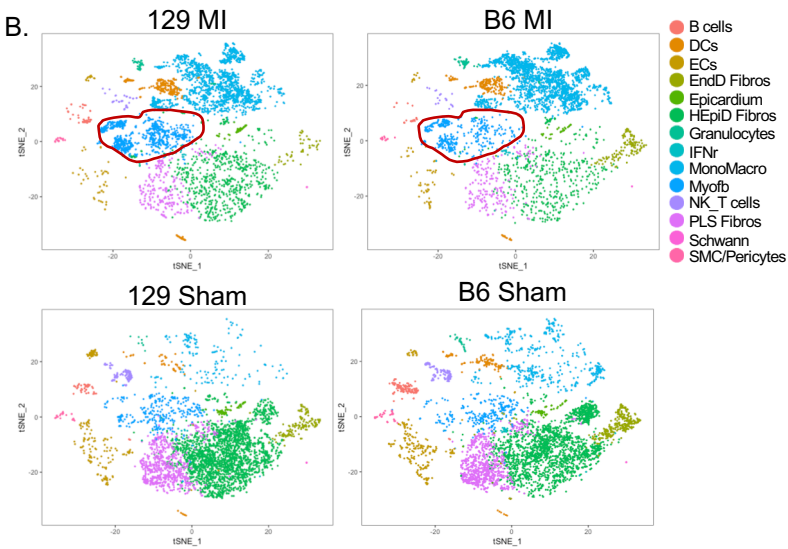

C.

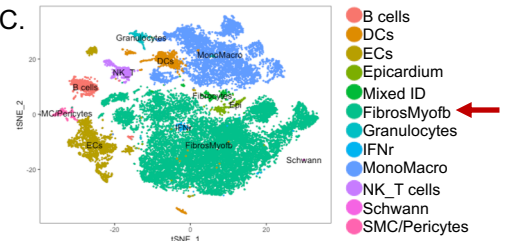

**Figure S6 Differential scRNAseq expression analyses between sham and 3d post-MI 129S1/SvImJ and C57bl/6J strains.** Related to Figure 6. (A) Differential cell composition between sham and 3d post-MI (time-point pre-cardiac rupture) hearts of the two strains. 27 clusters were identified from the analysis of about 17000 cells from 5 samples. The algorithm Harmony was used for the integration of samples from different experiments and genetic backgrounds. (B) tSNE visualization of differential cell composition among 129 and B6J sham and 3 days post-MI. Myofb blue cluster (highlighted in red) shows differential cell number between strains (as seen in (A)). (C) tSNE plot shows the aggregate of stromal cells (fibroblasts and myofibroblasts; red arrow) used for subsequent differential gene expression analysis.

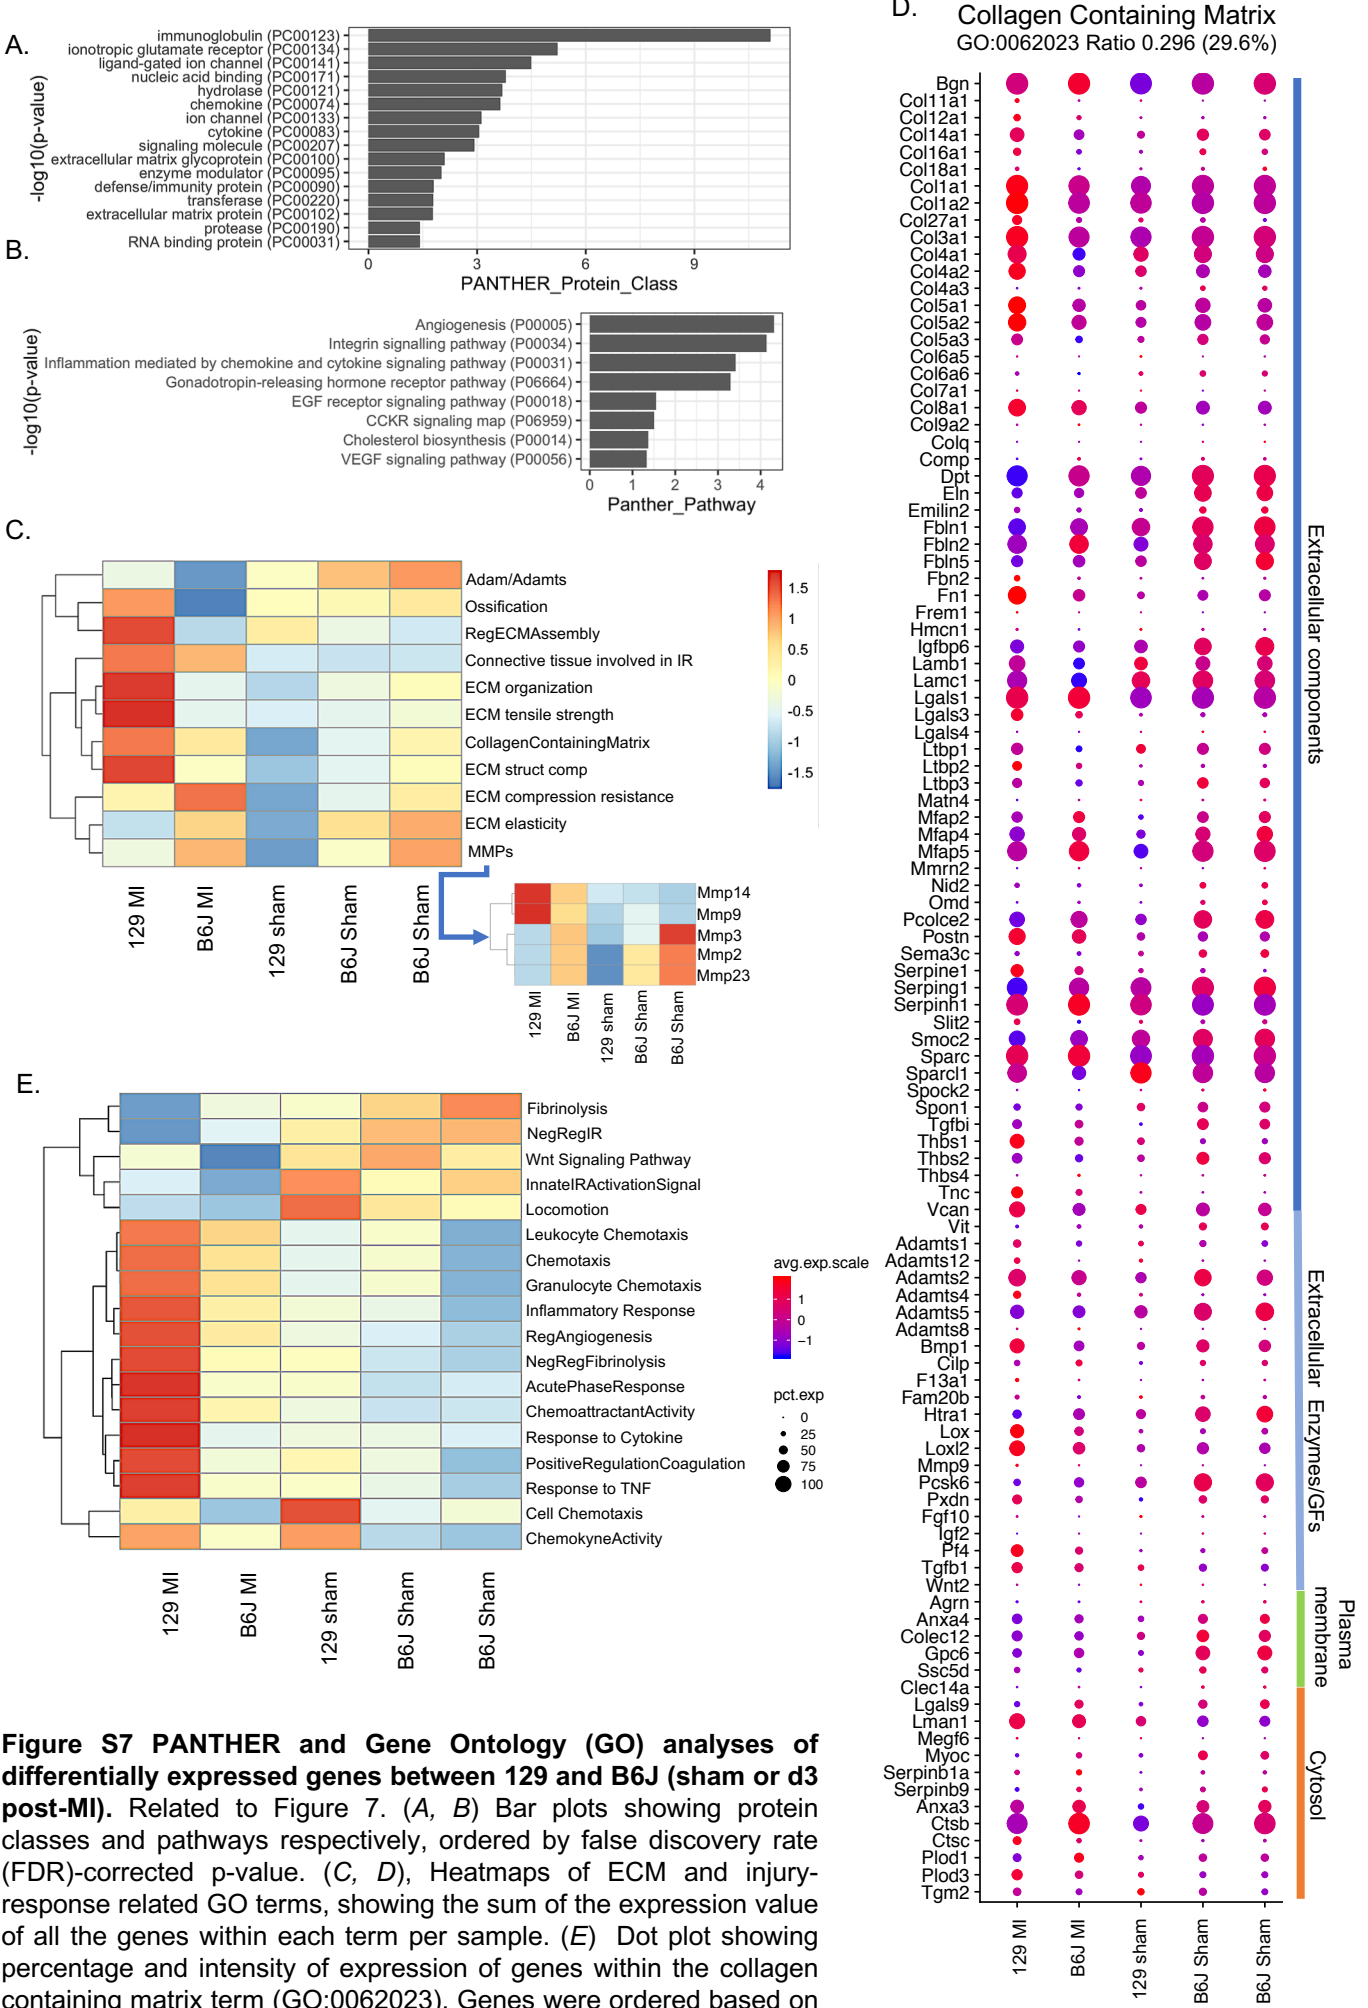

**Figure S7 PANTHER and Gene Ontology (GO) analyses of differentially expressed genes between 129 and B6J (sham or d3 post-MI).** Related to Figure 7. (A, B) Bar plots showing protein classes and pathways respectively, ordered by false discovery rate (FDR)-corrected p-value. (C, D), Heatmaps of ECM and injury-response related GO terms, showing the sum of the expression value of all the genes within each term per sample. (E) Dot plot showing percentage and intensity of expression of genes within the collagen containing matrix term (GO:0062023). Genes were ordered based on cellular localization and function.

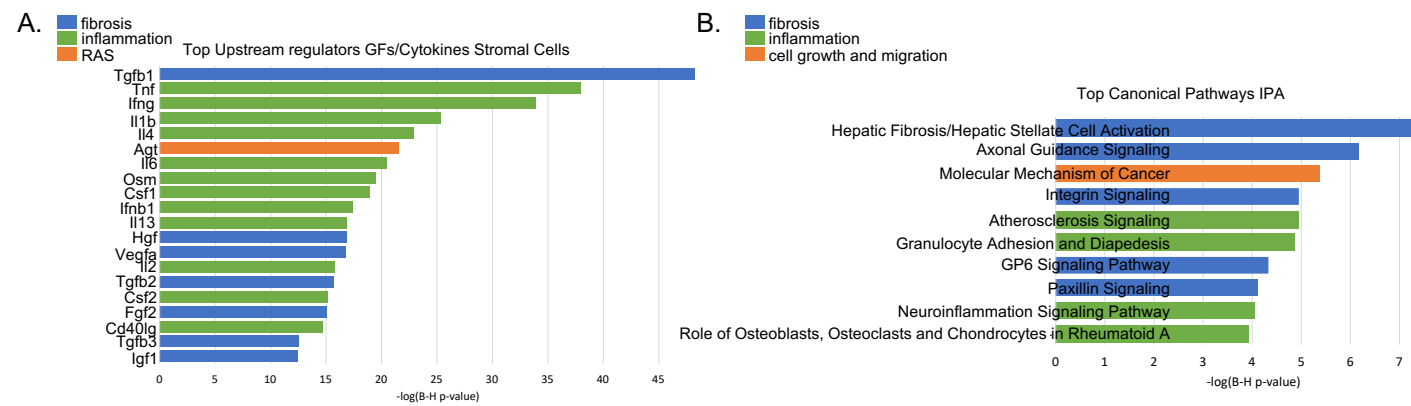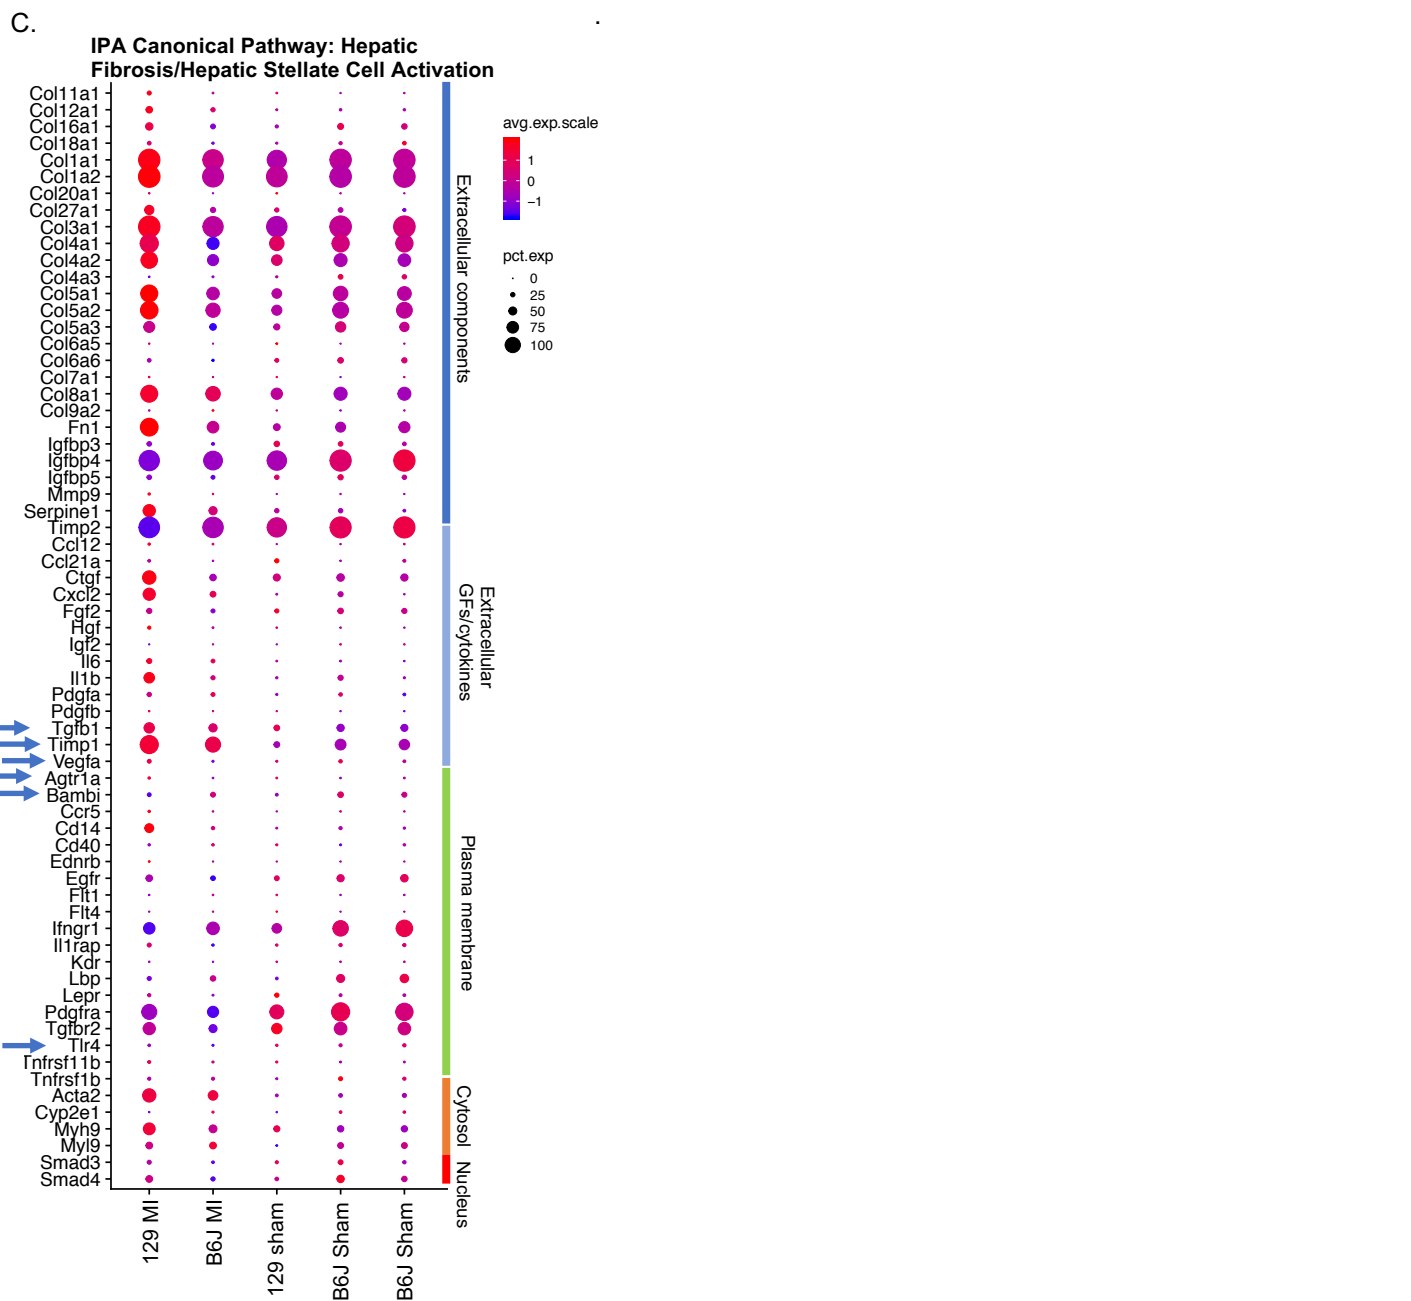

**Figure S8 Ingenuity Pathway Analysis (IPA) reveals genes and pathways involved in differential regulation of fibrosis between 129 and B6J mice.** Related to Figure 7. 3,922 genes differentially expressed between 129 and B6J (sham or d3 post-MI) were used for analysis. Benjamini-Hochberg (B-H) correction was used for false discovery rate (FDR). (A) Bar plot showing the top 20 growth factors and cytokines predicted as upstream regulators of differentially expressed genes, color coded for involvement in fibrosis, inflammation or the renin-angiotensin signaling (RAS) pathway. (B) Bar plot showing the top 10 IPA Canonical Pathways, colored by processes related to fibrosis, inflammation or cell growth and migration. (C) Dot plot showing the percentage and intensity of expression, across the samples, of genes within the top represented canonical pathway “Hepatic Fibrosis/Hepatic Stellate Cell Activation”. Genes were ordered based on cellular location. Blue arrows denote genes involved in the RAS-related pro-fibrotic mechanism.



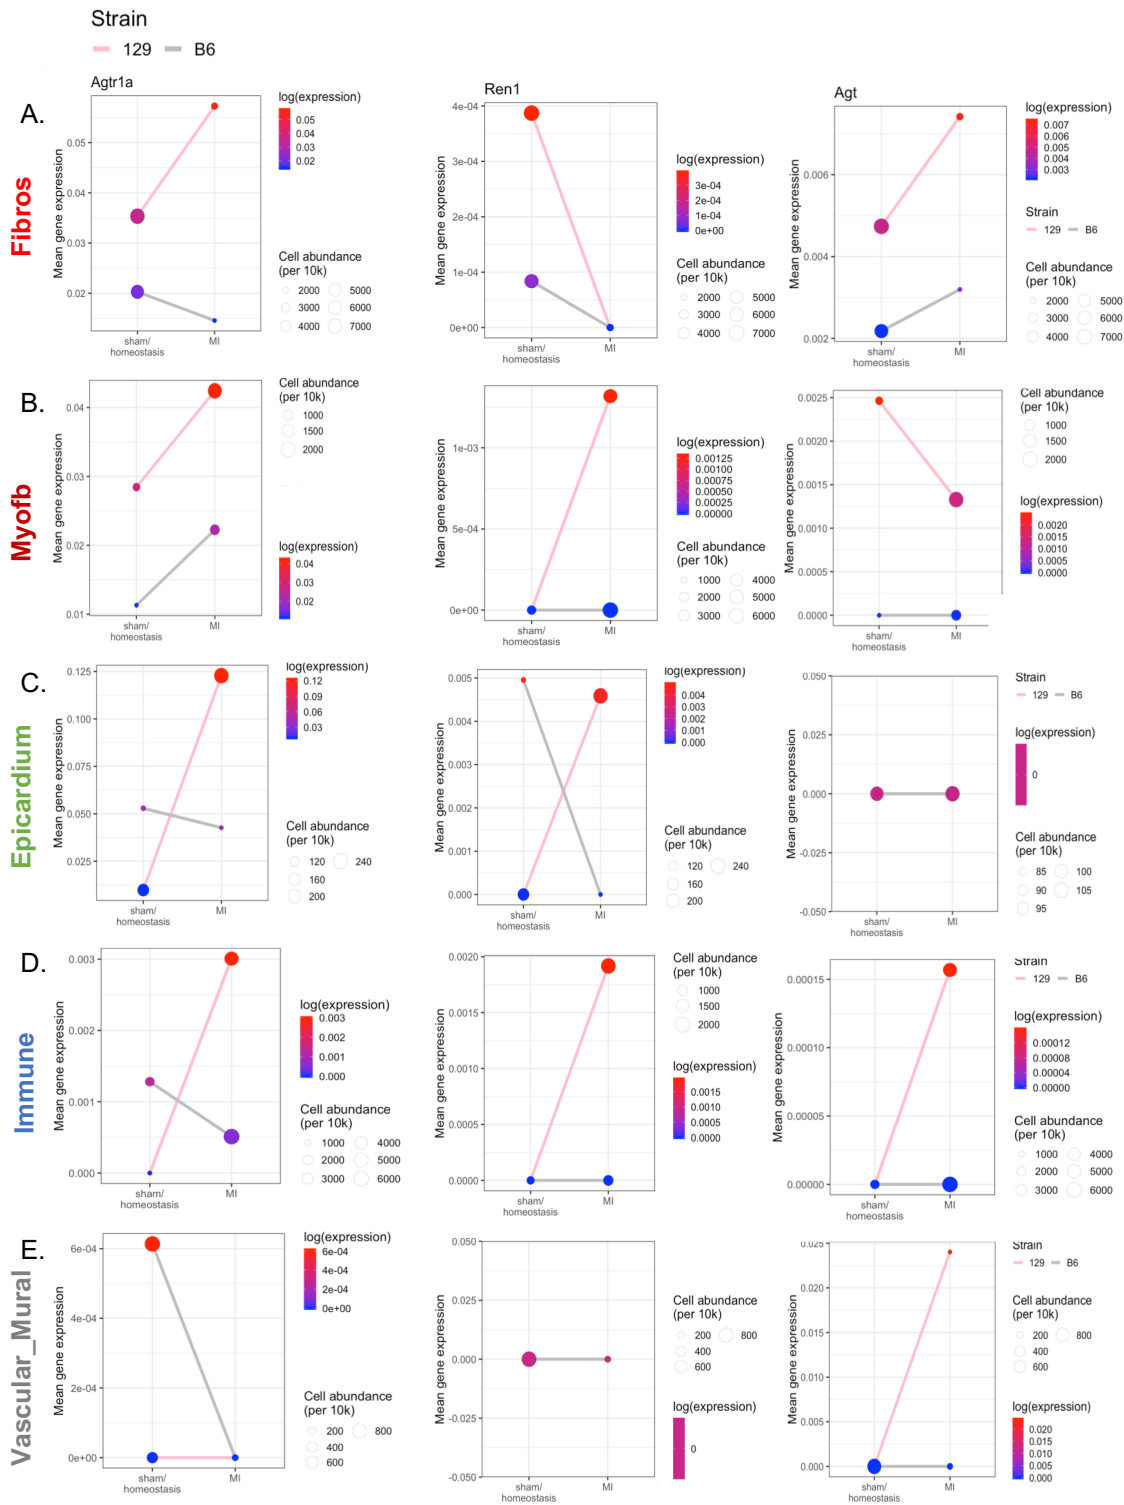

**Figure S9 Differential expression of RAS components among diverse cell clusters between 129 and B6J.** Related to Figure 7. Dot plots for cell abundance and expression level per each strain and time-point on clusters based on lineage [i.e. fibroblasts (A), myofibroblasts (B), epicardium (C), immune cells (D) and vascular mural cells (E)] for RAS pathway genes *Agtr1a*, *Ren1*, *Agt*.
